# Supplementary material
Source: ML conference proceedings conference paper supplement (https://openreview.net/forum?id=6XC5iKqRVm)
Supplement: supplementary_material [file attachment]

---

# DELTA: Diverse Client Sampling for Fasting Federated Learning

---

Anonymous Author(s)

Affiliation

Address

email

## Abstract

1 Partial client participation has been widely adopted in Federated Learning (FL)  
2 to reduce the communication burden efficiently. However, an inadequate client  
3 sampling scheme can lead to the selection of unrepresentative subsets, resulting in  
4 significant variance in model updates and slowed convergence. Existing sampling  
5 methods are either biased or can be further optimized for faster convergence. In this  
6 paper, we present DELTA, an unbiased sampling scheme designed to alleviate these  
7 issues. DELTA characterizes the effects of client diversity and local variance, and  
8 samples representative clients with valuable information for global model updates.  
9 In addition, DELTA is a proven optimal unbiased sampling scheme that minimizes  
10 variance caused by partial client participation and outperforms other unbiased  
11 sampling schemes in terms of convergence. Furthermore, to address full-client  
12 gradient dependence, we provide a practical version of DELTA depending on the  
13 available clients' information, and also analyze its convergence. Our results are  
14 validated through experiments on both synthetic and real-world datasets.

## 15 1 Introduction

16 Federated Learning (FL) is a distributed learning paradigm that allows a group of clients to collaborate  
17 with a central server to train a model. Edge clients can perform local updates without sharing their  
18 data, which helps to protect their privacy. However, communication can be a bottleneck in FL, as edge  
19 devices often have limited bandwidth and connection availability [58]. To reduce the communication  
20 burden, only a subset of clients are typically selected for training. However, an improper client  
21 sampling strategy, such as uniform client sampling used in FedAvg [38], can worsen the effects of  
22 data heterogeneity in FL. This is because the randomly selected unrepresentative subsets can increase  
23 the variance introduced by client sampling and slow down convergence.

24 Existing sampling strategies can be broadly classified into two categories: biased and unbiased.  
25 Unbiased sampling is important because it can preserve the optimization objective. However, only  
26 a few unbiased sampling strategies have been proposed in FL, such as multinomial distribution (MD)  
27 sampling and cluster sampling. Specifically, cluster sampling can include clustering based on sample  
28 size and clustering based on similarity. Unfortunately, these sampling methods often suffer from  
29 slow convergence, large variance, and computation overhead issues [2, 13].

30 To accelerate the convergence of FL with partial client participation, Importance Sampling (IS),  
31 an unbiased sampling strategy, has been proposed in recent literature [5, 49]. IS selects clients  
32 with a large gradient norm, as shown in Figure 1. Another sampling method shown in Figure 1 is  
33 cluster-based IS, which first clusters clients according to the gradient norm and then uses IS to select  
34 clients with a large gradient norm within each cluster.

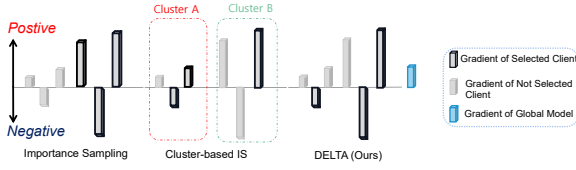

Figure 1: **Client selection illustration of different methods.** IS (left) selects high-gradient clients but faces redundant sampling issues. Cluster-based IS (mid) addresses redundancy, but using small gradients for updating continuously can slow down convergence. In contrast, DELTA (right) selects diverse clients with significant gradients without clustering operations.

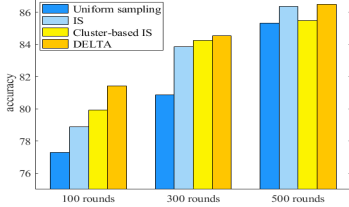

Figure 2: **Comparison of the convergence performance for different sampling methods.** In this example, we use a logistic regression model on non-iid MNIST data and sample 10 out of 200 clients. We run 500 communication rounds and report the average of the best 10 accuracies at 100, 300, and 500 rounds. This shows the accuracy performance from the initial training state to convergence.

Though IS and cluster-based IS have their advantages, 1) **IS could be inefficient because it can result in the transfer of excessive similar updates from the clients to the server.** This problem has been pointed out in recent works [52, 63], and efforts are being made to address it. One approach is to use cluster-based IS, which groups similar clients together. This can help, but 2) **cluster-based IS has its drawbacks in terms of convergence speed and clustering effect.** Figure 2 illustrates that both of these sampling methods can perform poorly at times. Specifically, compared with cluster-based IS, IS cannot fully utilize the diversity of gradients, leading to redundant sampling and a lack of substantial improvement in accuracy [52, 2]. While the inclusion of clients from small gradient groups in cluster-based IS leads to slow convergence as it approaches convergence, as shown by experimental results in Figure 6 and 7 in Appendix B.2. Furthermore, the clustering algorithm’s performance tends to vary when applied to different client sets with varying parameter configurations, such as different numbers of clusters, as observed in prior works [52, 51, 56].

To address the limitations of IS and cluster-based IS, namely excessive similar updates and poor convergence performance, we propose a novel sampling method for Federated Learning termed **DivERse cLienT sAMpling (DELTA)**. Compared to IS and cluster-based IS methods, DELTA tends to select clients with diverse gradients, as shown in Figure 1. This allows DELTA to utilize the advantages of a large gradient norm for convergence acceleration while also overcoming the issue of gradient similarity.

Additionally, we propose practical algorithms for DELTA and IS that rely on accessible information from partial clients, addressing the limitations of existing analysis based on full client gradients [35, 5]. We also provide convergence rates for these algorithms. We replace uniform client sampling with DELTA in FedAvg, referred to as **FedDELTA**, and replace uniform client sampling with IS in FedAvg, referred to as **FedIS**. Their practical versions are denoted as **FedPracDELTA** and **FedPracIS**.

**Toy Example and Motivation.** We present a toy example to illustrate our motivation, where each client has a regression model. The detailed settings of each model and the calculation of each sampling algorithm’s gradient are provided in Appendix B.1. Figure 3 shows that IS deviates from the ideal global model when aggregating gradients from clients with large norms. This motivates us to consider the correlation between local and global gradients in addition to gradient norms when sampling clients. *Compared to IS, DELTA selects clients with large gradient diversities, which exploits the clients’ information of both gradient norms and directions, resulting in a closer alignment to the ideal global model.*

**Our contributions.** In this paper, we propose an efficient unbiased sampling scheme in the sense that (i) It effectively addresses the issue of excessive similar gradients without the need for additional clustering, while taking advantage of the accelerated convergence of gradient-norm-based IS and (ii) it is provable better than uniform sampling or gradient norm-based sampling. The sampling scheme is versatile and can be easily integrated with other optimization techniques, such as momentum, to improve convergence further.

As our key contributions,

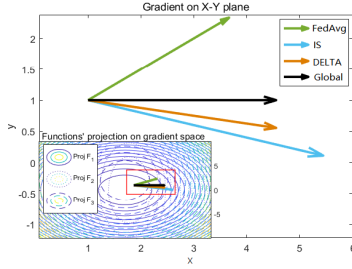

Figure 3: **Model update comparison: The closer to the ideal global update (black arrow), the better the sampling algorithm is.** The small window shows the projection of 3 clients' functions  $F_1, F_2, F_3$  in the X-Y plane, where  $\nabla F_1 = (2, 2), \nabla F_2 = (4, 1), \nabla F_3 = (6, -3)$  at  $(1, 1)$ . The enlarged image shows the aggregated gradients of FedAvg, IS, DELTA and ideal global gradient. Each algorithm samples two out of three clients: FedIS tends to select Client 2 and 3 with largest gradient norms, DELTA tends to select Client 1 and 3 with the largest gradient diversity and FedAvg is more likely to select Client 1 and 2 compared to IS and DELTA. The complete gradient illustration with clients' gradient is shown in Figure 5 in Appendix.

- We present DELTA, an unbiased FL sampling scheme based on gradient diversity and local variance. Our refined analysis shows that FedDELTA surpasses the state-of-the-art FedAvg in convergence rate by eliminating the  $\mathcal{O}(1/T^{2/3})$  term and a  $\sigma_G^2$ -related term of  $\mathcal{O}(1/T^{1/2})$ .
- We present a novel theoretical analysis of nonconvex FedIS, which yields a superior convergence rate compared to existing works while relying on a more lenient assumption. Moreover, our analysis eliminates the  $\mathcal{O}(1/T^{2/3})$  term of the convergence rate, in contrast to FedAvg.
- We present a practical algorithm for DELTA in partial participation settings, utilizing available information to mitigate the reliance on full gradients. We prove that the convergence rates of these practical algorithms can attain the same order as the theoretical optimal sampling probabilities for DELTA and IS.

## 2 Related Work

Client sampling in federated learning (FL) can be categorized into unbiased and biased methods [14]. Unbiased methods, including multinomial sampling and importance sampling [30, 5, 49], ensure that the expected client aggregation is equivalent to the deterministic global aggregation when all clients participate. Unlike unbiased sampling, which has received comparatively little attention, biased sampling has been extensively examined in the context of federated learning, such as selecting clients with higher loss [7] or larger updates [48]. Recently, cluster-based client selection, which involves grouping clients into clusters and sampling from these clusters, has been proposed to sample diverse clients and reduce variance [41, 12, 52]. Nevertheless, the clustering will require extra communication and computational resources. The proposed DELTA algorithm can be seen as a muted version of a diverse client clustering algorithm without clustering operation.

While recent works [57, 28] have achieved comparable convergence rates to ours using variance reduction techniques, it is worth noting that these techniques are orthogonal to ours and can be easily integrated with our approach. Although [60] achieved the same convergence rate as ours, but their method requires dependent sampling and mixing participation conditions, which can lead to security problems and exceed the communication capacity of the server. In contrast, our method avoids these issues by not relying on such conditions.

A more comprehensive discussion of the related work can be found in Appendix A.

## 3 Theoretical Analysis and An Improved FL Sampling Strategy

This section presents FL preliminaries and analyzes sampling algorithms, including the convergence rate of nonconvex FedIS in Section 3.2, improved convergence analysis for FL sampling in Section 3.3, and proposal and convergence rate of the DELTA sampling algorithm in Section 3.4.

In FL, the objective of the global model is a sum-structured optimization problem:

$$f^* = \min_{x \in \mathbb{R}^d} [f(x) := \sum_{i=1}^m w_i F_i(x)] , \quad (1)$$

where  $F_i(x) = \mathbb{E}_{\xi_i \sim D_i} [F_i(x, \xi_i)]$  represents the local objective function of client  $i$  over data distribution  $D_i$ , and  $\xi_i$  means the sampled data of client  $i$ .  $m$  is the total number of clients and  $w_i$  represents the weight of client  $i$ . With partial client participation, FedAvg randomly selects  $|S_t| = n$  clients ( $n \leq m$ ) to communicate and update model. Then the loss function of actual participating users in each round can be expressed as:

$$f_{S_t}(x_t) = \frac{1}{n} \sum_{i \in S_t} F_i(x_t) . \quad (2)$$

Table 1: **Comparison of convergence rate for different sampling algorithms:** Number of communication rounds required to reach  $\epsilon$  or  $\epsilon + \varphi$  ( $\epsilon$  for unbiased sampling and  $\epsilon + \varphi$  for biased sampling, where  $\varphi$  is a non-convergent constant term) accuracy for FL.  $\sigma_L$  is local variance bound, and  $G$  bound is  $E\|\nabla F_i(x) - \nabla f(x)\|^2 \leq G^2$ .  $\Gamma$  is the distance of global optimum and the average of local optimum (Heterogeneity bound),  $\mu$  corresponds to  $\mu$  strongly convex. and  $\zeta_G$  is the gradient diversity.

| Algorithm               | Convexity | Partial Worker | Unbiasedness | Convergence rate                                                                                                                                             | Assumption                         |
|-------------------------|-----------|----------------|--------------|--------------------------------------------------------------------------------------------------------------------------------------------------------------|------------------------------------|
| SGD                     | S/N       | ✓              | ✓            | $\frac{\sigma_L^2}{\mu m K \epsilon} + (\frac{1}{\mu}) / \frac{\sigma_L^2}{m K \epsilon^2} + \frac{1}{\epsilon}$                                             | $\sigma_L$ bound                   |
| <b>FedDELTA</b>         | N         | ✓              | ✓            | $\frac{\sigma_L^2}{\eta_L \zeta_G^2} + \frac{\hat{M}^2}{K \epsilon}$                                                                                         | Assumption 3                       |
| <b>FedPracDELTA</b>     | N         | ✓              | ✓            | $\frac{\sigma_L^2}{n K \epsilon^2} + \frac{\hat{M}^2}{K \epsilon}$                                                                                           | Assumption 3 and Assumption 4      |
| <b>FedIS (ours)</b>     | N         | ✓              | ✓            | $\frac{\sigma_L^2 + K \sigma_G^2}{n K \epsilon^2} + \frac{\hat{M}^2}{K \epsilon}$                                                                            | Assumption 3                       |
| FedIS (others) [5]      | N         | ✓              | ✓            | $\frac{\hat{M}^2}{n K \epsilon^2} + \frac{A^2 + 1}{\epsilon} + \frac{\sigma_G}{\epsilon^{3/2}}$                                                              | Assumption 3 and $\rho$ Assumption |
| FedIS (others) [36]     | S         | ✓              | ✓            | $\frac{\sigma_L^2 + 4n K G^2 + 6n \Gamma}{\epsilon} + \frac{K^2 G^2}{\epsilon} + \frac{\ w_0 - w^*\ ^2}{\mu K \epsilon}$                                     | $G$ bound                          |
| <b>FedPracIS (ours)</b> | N         | ✓              | ✓            | $\frac{\sigma_L^2 + K U^2 \sigma_G^2}{n K \epsilon^2} + \frac{\hat{M}^2}{K \epsilon}$                                                                        | Assumption 3 and Assumption 4      |
| FedAvg [65]             | N         | ✓              | ✓            | $\frac{\sigma_L^2}{n K \epsilon^2} + \frac{4K \sigma_G^2}{n K \epsilon^2} + \frac{\hat{M}^2}{K \epsilon} + \frac{K^{1/3} \hat{M}^2}{n^{1/3} \epsilon^{2/3}}$ | $G$ bound                          |
| FedAvg [21]             | N         | ✓              | ✓            | $\frac{\hat{M}^2}{n K \epsilon^2} + \frac{A^2 + 1}{\epsilon} + \frac{\sigma_G}{\epsilon^{3/2}}$                                                              | Assumption 3                       |
| DivFL [2]               | S         | ✓              | ×            | $\frac{1}{\epsilon} + \frac{1}{\epsilon}$                                                                                                                    | Heterogeneity Gap                  |
| Power-of-Choice [7]     | S         | ✓              | ×            | $\frac{\sigma_L^2 + G^2}{\epsilon + \varphi} + \frac{\Gamma}{\mu}$                                                                                           | Heterogeneity Gap                  |
| FedAvg [65]             | N         | ×              | ✓            | $\frac{\sigma_L^2}{n K \epsilon^2} + \frac{\sigma_G^2 / (4K) + \sigma_G^2}{\epsilon}$                                                                        | $\sigma_G$ bound                   |
| Arbitrary Sampling[60]  | N         | Mix            | ✓            | $\frac{\sigma_G^2 + (1 + \sigma_L^2) n \rho}{n K \epsilon^2} + \frac{\hat{M}^2}{K \epsilon}$                                                                 | Assumption 3                       |

$$\hat{M}^2 = \sigma_L^2 + 4K \sigma_G^2, \hat{M}^2 = \sigma_L^2 + K(1 - n/m) \sigma_G^2, \hat{M}^2 = \sigma_L^2 + 6K \sigma_G^2, \hat{M}^2 = \sigma_L^2 + 4K \zeta_G^2, \hat{M}^2 = K \zeta_G^2 + K \sigma_L^2.$$

Convexity: S and N are abbreviations for strong convex and nonconvex, respectively.  $\rho$  assumption: Bound of the similarity among local gradients.

Mix participation: the number of participating clients is random, from none to full participation.

For ease of theoretical analysis, we make the following commonly used assumptions:

### 3.1 Assumptions

**Assumption 1 (L-Smooth).** *There exists a constant  $L > 0$ , such that  $\|\nabla F_i(x) - \nabla F_i(y)\| \leq L \|x - y\|$ ,  $\forall x, y \in \mathbb{R}^d$ , and  $i = 1, 2, \dots, m$ .*

**Assumption 2 (Unbiased Local Gradient Estimator and Local Variance).** *Let  $\xi_t^i$  be a random local data sample in the round  $t$  at client  $i$ :  $\mathbb{E}[\nabla F_i(x_t, \xi_t^i)] = \nabla F_i(x_t)$ ,  $\forall i \in [m]$ . The function  $F_i(x_t, \xi_t^i)$  has a bounded local variance of  $\sigma_{L,i} > 0$ , satisfying  $\mathbb{E}[\|\nabla F_i(x_t, \xi_t^i) - \nabla F_i(x_t)\|^2] = \sigma_{L,i}^2 \leq \sigma_L^2$ .*

**Assumption 3 (Bound Dissimilarity).** *There exists constants  $\sigma_G \geq 0$  and  $A \geq 0$  such that  $\mathbb{E}\|\nabla F_i(x)\|^2 \leq (A^2 + 1)\|\nabla f(x)\|^2 + \sigma_G^2$ . When all local loss functions are identical,  $A^2 = 0$  and  $\sigma_G^2 = 0$ .*

The above assumptions are commonly used in both non-convex optimization and FL literature, see e.g. [21, 27, 60].

We notice that Assumption 3 can be further relaxed by Assumption 2 of [24]. We also provide Proposition C.4 in Appendix C to show all our convergence analysis, including Theorem 3.1, 3.4 and Corollary 4.1.4.2 can be easily extended to the relaxed assumption while keeping the order of convergence rate unchanged.

### 3.2 Convergence Analysis of FedIS

As discussed in the introduction, IS faces an excessive gradient similarity problem, necessitating the development of a novel diversity sampling method. Prior to delving into the specifics of our new sampling strategy, we first present the convergence rate of FL under standard IS analysis in this section; this analysis itself is not well explored, particularly in the nonconvex setting. The complete FedIS algorithm is provided in Algorithm 2 of Appendix D, which differs from DELTA only in sampling probability (line 2) by using  $p_i \propto \|\sum_{k=0}^{K-1} g_{t,k}^i\|$ .

**Theorem 3.1 (Convergence rate of FedIS).** *Let constant local and global learning rates  $\eta_L$  and  $\eta$  be chosen as such that  $\eta_L < \min(1/(8LK), C)$ , where  $C$  is obtained from the condition that  $\frac{1}{2} - 10L^2 K^2 (A^2 + 1) \eta_L^2 - \frac{L^2 \eta K (A^2 + 1)}{2n} \eta_L > 0$ , and  $\eta \leq 1/(\eta_L L)$ . In particular, suppose  $\eta_L = \mathcal{O}\left(\frac{1}{\sqrt{TKL}}\right)$  and  $\eta = \mathcal{O}\left(\sqrt{Kn}\right)$ , under Assumptions 1-3, the expected gradient norm of FedIS algorithm 2 will be bounded as follows:*

$$\min_{t \in [T]} \mathbb{E}\|\nabla f(x_t)\|^2 \leq \mathcal{O}\left(\frac{f^0 - f^*}{\sqrt{nKT}}\right) + \underbrace{\mathcal{O}\left(\frac{\sigma_L^2 + K \sigma_G^2}{\sqrt{nKT}}\right) + \mathcal{O}\left(\frac{M^2}{T}\right)}_{\text{order of } \Phi}. \quad (3)$$

where  $f^0 = f(x_0)$ ,  $f^* = f(x_*)$ ,  $M = \sigma_L^2 + 4K\sigma_G^2$  and the expectation is over the local dataset samples among clients.

The FedIS sampling probability  $p_i^t$  is determined by minimizing the variance of convergence with respect to  $p_i^t$ . The variance term  $\Phi$  is:

$$\Phi = \frac{5\eta_L^2 K L^2}{2} M^2 + \frac{\eta_L L}{2m} \sigma_L^2 + \frac{L\eta_L}{2nK} \text{Var}\left(\frac{1}{mp_i^t} \hat{g}_i^t\right), \quad (4)$$

where  $\text{Var}(1/(mp_i^t) \hat{g}_i^t)$  is called *update variance*. By optimizing the update variance, we get the sampling probability FedIS:

$$p_i^t = \frac{\|\hat{g}_i^t\|}{\sum_{j=1}^m \|\hat{g}_j^t\|}, \quad (5)$$

where  $\hat{g}_i^t = \sum_{k=0}^{K-1} \nabla F_i(x_{k,t}^i, \xi_{k,t}^i)$  is the sum of the gradient updates of multiple local updates. The proof details of Theorem 3.1 and derivation of sampling probability FedIS are detailed in Appendix D and Appendix F.1.

**Remark 3.2** (Explanation for the convergence rate). *It is worth mentioning that although a few works provide the convergence upper bound of FL with gradient-based sampling, several limitations exist in these analyses and results:*

- 1) [49, 35] analyzed FL with IS using a strongly convex condition, whereas we extended the analysis to the non-convex problem.
  - 2) Our analysis results, compared to the very recent non-convex analysis of FedIS [5] and FedAvg, remove the term  $\mathcal{O}(T^{-\frac{2}{3}})$ , although all these works choose a learning rate of  $\mathcal{O}(T^{-\frac{1}{2}})$ . Thus, our result achieves a tighter convergence rate when we use  $\mathcal{O}(1/T + 1/T^{2/3})$  (provided by [43]) as our lower bound of convergence (see Table 1).
- The comparison results in Table 1 reveal that even when  $\sigma_G$  is large and becomes a dependency term for convergence rate, FedIS (ours) is still better than FedAvg and FedIS (others) since our result reduces the coefficient of  $\sigma_G$  in the dominant term  $\mathcal{O}(T^{-\frac{1}{2}})$ .

**Remark 3.3** (Extending FedIS to practical algorithm). *The existing analysis of IS algorithms [35, 5] relies on information from full clients, which is not available in partial participation FL. We propose a practical algorithm for FedIS that only uses information from available clients and provide its convergence rate in Corollary 4.1 in Section 4.*

Despite its success in reducing the variance term in the convergence rate, FedIS is far from optimal due to issues with high gradient similarity and the potential for further minimizing the variance term (i.e., the global variance  $\sigma_G$  and local variance  $\sigma_L$  in  $\Phi$ ). In the next section, we will discuss how to address this challenging variance term.

### 3.3 An Improved Convergence Analysis for FedDELTA

FedIS and FedDELTA have different approaches to analyzing objectives, with FedIS analyzing the global objective and FedDELTA analyzing a surrogate objective  $\tilde{f}(x)$  (cf. (7)). This leads to different convergence variance and sampling probabilities between the two methods. A flowchart (Figure 8 in Appendix E) has been included to illustrate the differences between FedIS and FedDELTA.

**The limitations of FedIS.** As shown in Figure 1, IS may have excessive similar gradient selection. The variance  $\Phi$  in (4) reveals that the standard IS strategy can only control the update variance  $\text{Var}(1/(mp_i^t) \hat{g}_i^t)$ , leaving other terms in  $\Phi$ , namely  $\sigma_L$  and  $\sigma_G$ , untouched. Therefore, the standard IS is ineffective at addressing the excessive similar gradient selection problem, motivating the need for a new sampling strategy to address the issue of  $\sigma_L$  and  $\sigma_G$ .

**The decomposition of the global objective.** As inspired by the proof of Theorem 3.1 as well as the corresponding Lemma C.1 (stated in Appendix) proposed for unbiased sampling, the gradient of

#### Algorithm 1 FedDELTA and FedPracDELTA : Federated learning with unbiased diverse sampling

**Require:** initial weights  $x_0$ , global learning rate  $\eta$ , local learning rate  $\eta_L$ , number of training rounds  $T$

**Ensure:** trained weights  $x_T$

```

1: for round  $t = 1, \dots, T$  do
2:   Sampling clients using DELTA (13)
3:   Sampling clients using Practical DELTA (16)
4:   for each worker  $i \in S_t$ , in parallel do
5:      $x_{t,0}^i = x_t$ 
6:     for  $k = 0, \dots, K-1$  do
7:       compute  $g_{t,k}^i = \nabla F_i(x_{t,k}^i, \xi_{t,k}^i)$ 
8:       Local update:  $x_{t,k+1}^i = x_{t,k}^i - \eta_L g_{t,k}^i$ 
9:       Let  $\Delta_t^i = x_{t,K}^i - x_{t,0}^i = -\eta_L \sum_{k=0}^{K-1} g_{t,k}^i$ 
10:    At Server:
11:    Receive  $\Delta_t^i, i \in S_t$ 
12:    let  $\Delta_t = \frac{1}{|S_t|} \sum_{i \in S_t} \frac{n_i}{np_i^t} \Delta_t^i$ 
13:    Server update:  $x_{t+1} = x_t + \eta \Delta_t$ 
14:    Broadcast  $x_{t+1}$  to clients

```

global objective can be decomposed into the gradient of surrogate objective  $\tilde{f}(x_t)$  and update gap,

$$\mathbb{E}\|\nabla f(x_t)\|^2 = \mathbb{E}\|\nabla \tilde{f}_{S_t}(x_t)\|^2 + \chi_t^2, \quad (6)$$

where  $\chi_t = \mathbb{E}\|\nabla \tilde{f}_{S_t}(x_t) - \nabla f(x_t)\|$  is the update gap.

Intuitively, the surrogate objective represents the practical objective of the participating clients in each round, while the update gap  $\chi_t$  represents the distance between partial client participation and full client participation. The convergence behavior of the update gap  $\chi_t^2$  is analogous to the update variance in  $\Phi$ , and the convergence of the surrogate objective  $\mathbb{E}\|\nabla \tilde{f}_{S_t}(x_t)\|^2$  depends on the other variance terms in  $\Phi$ , namely the local variance and global variance.

Minimizing the surrogate objective allows us to further reduce the variance of convergence, and we will focus on analyzing surrogate objective below. We first formulate the surrogate objective with an arbitrary unbiased sampling probability.

**Surrogate objective formulation.** The expression of the surrogate objective relies on the property of IS. In particular, IS aims to substitute the original sampling distribution  $p(z)$  with another arbitrary sampling distribution  $q(z)$  while keeping the expectation unchanged:  $\mathbb{E}_{q(z)}[F_i(z)] = \mathbb{E}_{p(z)}[q_i(z)/p_i(z)F_i(z)]$ . According to the Monte Carlo method, when  $q(z)$  follows the uniform distribution, we can estimate  $\mathbb{E}_{q(z)}[F_i(z)]$  by  $1/m \sum_{i=1}^m F_i(z)$  and  $\mathbb{E}_{p(z)}[q_i(z)/p_i(z)F_i(z)]$  by  $1/n \sum_{i \in S_t} 1/m p_i F_i(z)$ , where  $m$  and  $|S_t| = n$  are the sample sizes. Based on IS property, we formulate the surrogate objective:

$$\tilde{f}_{S_t}(x_t) = \frac{1}{n} \sum_{i \in S_t} \frac{1}{m p_i^t} F_i(x_t), \quad (7)$$

where  $m$  is the total number of clients,  $|S_t| = n$  is the number of participating clients in each round, and  $p_i^t$  is the probability that client  $i$  is selected at round  $t$ .

As noted in Lemma C.2 in the appendix, we have:<sup>1</sup>:

$$\min_{t \in [T]} \mathbb{E}\|\nabla f(x_t)\|^2 = \min_{t \in [T]} \mathbb{E}\|\nabla \tilde{f}(x_t)\|^2 + \mathbb{E}\|\chi_t\|^2 \leq \min_{t \in [T]} 2\mathbb{E}\|\nabla \tilde{f}(x_t)\|^2. \quad (8)$$

Then the convergence rate of the global objective can be formulated as follows:

**Theorem 3.4** (Convergence upper bound of FedDELTA). *Under Assumption 1–3 and let local and global learning rates  $\eta$  and  $\eta_L$  satisfy  $\eta_L < 1/(2\sqrt{10}KL\sqrt{\frac{1}{n} \sum_{i=1}^m \frac{1}{m p_i^t}})$  and  $\eta\eta_L \leq 1/KL$ , the minimal gradient norm will be bounded as below:*

$$\min_{t \in [T]} \mathbb{E}\|\nabla f(x_t)\|^2 \leq \frac{f^0 - f^*}{c\eta\eta_L K T} + \frac{\tilde{\Phi}}{c}, \quad (9)$$

where  $f^0 = f(x_0)$ ,  $f^* = f(x_*)$ ,  $c$  is a constant, and the expectation is over the local dataset samples among all workers. The combination of variance  $\tilde{\Phi}$  represents combinations of local variance and client gradient diversity.

We derive the convergence rates for both sampling with replacement and sampling without replacement. For sampling without replacement:

$$\tilde{\Phi} = \frac{5L^2 K \eta_L^2}{2mn} \sum_{i=1}^m \frac{1}{p_i^t} (\sigma_{L,i}^2 + 4K\zeta_{G,i,t}^2) + \frac{L\eta_L\eta}{2n} \sum_{i=1}^m \frac{1}{m^2 p_i^t} \sigma_{L,i}^2. \quad (10)$$

For sampling with replacement,

$$\tilde{\Phi} = \frac{5L^2 K \eta_L^2}{2m^2} \sum_{i=1}^m \frac{1}{p_i^t} (\sigma_{L,i}^2 + 4K\zeta_{G,i,t}^2) + \frac{L\eta_L\eta}{2n} \sum_{i=1}^m \frac{1}{m^2 p_i^t} \sigma_{L,i}^2, \quad (11)$$

where  $\zeta_{G,i,t} = \|\nabla F_i(x_t) - \nabla f(x_t)\|$  and let  $\zeta_G$  be an upper bound for all  $i$ , i.e.,  $\zeta_{G,i,t} \leq \zeta_G$ . The proof details of Theorem 3.4 can be found in Appendix E.

### 3.4 Proposed Sampling Strategy: DELTA

The expression of the convergence upper bound suggests that utilizing sampling to optimize the convergence variance can accelerate the convergence. Hence, we can formulate an optimization problem that minimizes the variance  $\tilde{\Phi}$  with respect to the proposed sampling probability  $p_i^t$ :

<sup>1</sup>With slight abuse of notation, we use the  $\tilde{f}(x_t)$  for  $\tilde{f}_{S_t}(x_t)$  in this paper.

$$\min_{p_i^t} \tilde{\Phi} \quad \text{s.t.} \quad \sum_{i=1}^m p_i^t = 1, \quad (12)$$

where  $\tilde{\Phi}$  is a linear combination of local variance  $\sigma_{L,i}$  and gradient diversity  $\zeta_{G,i,t}$  (cf. Theorem 3.4).

**Corollary 3.5** (Optimal sampling probability of DELTA). *By solving the above optimization problem, the optimal sampling probability is determined as follows:*

$$p_i^t = \frac{\sqrt{\alpha_1 \zeta_{G,i,t}^2 + \alpha_2 \sigma_{L,i}^2}}{\sum_{j=1}^m \sqrt{\alpha_1 \zeta_{G,j,t}^2 + \alpha_2 \sigma_{L,j}^2}}, \quad (13)$$

where  $\alpha_1$  and  $\alpha_2$  are constants defined as  $\alpha_1 = 20K^2 L \eta_L$  and  $\alpha_2 = 5KL\eta_L + \frac{\eta}{n}$ .

**Remark 3.6.** We note that a tension exists between the optimal sampling probability (13) and the setting of partial participation for FL. Thus, we also provide a practical implementation version for DELTA and analyze its convergence in Section 4. In particular, we will show that the convergence rate of the practical implementation version keeps the same order with a coefficient difference.

**Corollary 3.7** (Convergence rate of FedDELTA). *Let  $\eta_L = \mathcal{O}\left(\frac{1}{\sqrt{TKL}}\right)$ ,  $\eta = \mathcal{O}\left(\sqrt{Kn}\right)$  and substitute the optimal sampling probability (13) back to  $\tilde{\Phi}$ . Then for sufficiently large  $T$ , the expected norm of DELTA algorithm 1 satisfies:*

$$\min_{t \in [T]} \mathbb{E} \|\nabla f(x_t)\|^2 \leq \underbrace{\mathcal{O}\left(\frac{f^0 - f^*}{\sqrt{nKT}}\right) + \mathcal{O}\left(\frac{\sigma_L^2}{\sqrt{nKT}}\right) + \mathcal{O}\left(\frac{\sigma_L^2 + 4K\zeta_G^2}{KT}\right)}_{\text{order of } \tilde{\Phi}}. \quad (14)$$

**Difference between FedDELTA and FedIS.** The primary distinction between FedDELTA and FedIS lies in the difference between  $\tilde{\Phi}$  and  $\Phi$ . FedIS aims to decrease the update variance term  $\text{Var}(1/(mp_i^t)\hat{g}_i^t)$  in  $\Phi$ , while FedDELTA aims to reduce the entire quantity  $\tilde{\Phi}$ , which is composed of both gradient diversity and local variance. By minimizing  $\tilde{\Phi}$ , we can further reduce the terms of  $\Phi$  that cannot be minimized through FedIS. This leads to different expressions for the optimal sampling probability. The difference between the two resulting update gradients is discussed in Figure 3. Additionally, as seen in Table 1, FedDELTA achieves a superior convergence rate of  $\mathcal{O}(G^2/\epsilon^2)$  compared to other unbiased sampling algorithms.

**Compare DELTA with uniform sampling.** According to the Cauchy-Schwarz inequality, DELTA is at least better than uniform sampling by reducing variance:  $\frac{\tilde{\Phi}_{\text{uniform}}}{\tilde{\Phi}_{\text{DELTA}}} = \frac{m \sum_{i=1}^m (\sqrt{\alpha_1 \sigma_L^2 + \alpha_2 \zeta_{G,i,t}^2})^2}{(\sum_{i=1}^m \sqrt{\alpha_1 \sigma_L^2 + \alpha_2 \zeta_{G,i,t}^2})^2} \geq 1$ . This implies that DELTA does reduce the variance, especially when  $\frac{(\sum_{i=1}^m \sqrt{\alpha_1 \sigma_L^2 + \alpha_2 \zeta_{G,i,t}^2})^2}{\sum_{i=1}^m (\sqrt{\alpha_1 \sigma_L^2 + \alpha_2 \zeta_{G,i,t}^2})^2} \ll m$ .

**The significance of DELTA.** (1) DELTA is the first unbiased sampling algorithm, to the best of our knowledge, that considers both gradient diversity and local variance in sampling, accelerating convergence. (2) Developing DELTA inspires an improved convergence analysis by focusing on the surrogate objective, leading to a superior convergence rate for FL. (3) Moreover, DELTA can be seen as an unbiased version with the complete theoretical justification for the existing heuristic or biased diversity sampling algorithm of FL, such as [2].

## 4 FedPracDELTA and FedPracIS: The Practical Algorithms

The gradient-norm-based sampling method necessitates the calculation of the full gradient in every iteration [10, 70]. However, acquiring each client's gradient in advance is generally impractical in FL. To overcome this obstacle, we leverage the gradient from the previous participated round to estimate the gradient of the current round, thus reducing computational resources [49].

For FedPracIS, at round 0, all probabilities are set to  $1/m$ . Then, during the  $i_{th}$  iteration, once participating clients  $i \in S_t$  have sent the server their updated gradients, the sampling probabilities are updated as follows:

$$p_{i,t+1}^* = \frac{\|\hat{g}_{i,t}\|}{\sum_{i \in S_t} \|\hat{g}_{i,t}\|} (1 - \sum_{i \in S_t^c} p_{i,t}^*), \quad (15)$$

where the multiplicative factor ensures that all probabilities sum to 1. The FedPracIS algorithm is shown in Algorithm 2 of Appendix D.



For FedPracDELTA, we use the average of the latest participated clients' gradients to approximate the true gradient of the global model. For local variance, it is obtained by the local gradient's variance over local batches. Specifically,  $\zeta_{G,i,t} = \|\hat{g}_{i,t} - \nabla \hat{f}(x_t)\|$ , where  $\nabla \hat{f}(x_t) = \frac{1}{n} \sum_{i \in S_t} \hat{g}_{i,t} = \frac{1}{n} \sum_{i \in S_t} \sum_{k=0}^{K-1} \nabla F_i(x_{k,t}^i, \xi_{k,t}^i)$  and  $\sigma_{L,i}^2 = \frac{1}{|B|} \sum_{b \in B} (\hat{g}_{i,t}^b - \frac{1}{|B|} \sum_{b \in B} \hat{g}_{i,t}^b)^2$ , where  $b \in B$  is the local data batch. Then the sampling probabilities are updated as follows:

$$p_{i,t+1}^* = \frac{\sqrt{\alpha_1 \zeta_{G,i,t}^2 + \alpha_2 \sigma_{L,i}^2}}{\sum_{i \in S_t} \sqrt{\alpha_1 \zeta_{G,i,t}^2 + \alpha_2 \sigma_{L,i}^2}} (1 - \sum_{j \in S_t^c} p_{j,t}^*). \quad (16)$$

The FedPracDELTA algorithm is shown in Algorithm 1.

**Assumption 4** (Local gradient norm bound). *The gradients  $\nabla F_i(x)$  are uniformly upper bounded (by a constant  $G > 0$ )  $\|\nabla F_i(x)\|^2 \leq G^2, \forall i$ .*

Assumption 4 is a general assumption in IS community to bound the gradient norm [70, 10, 23], and it is also used in the FL community to analyze convergence [2, 68]. This assumption tells us a useful fact that will be used later:  $\|\nabla F_i(x_{t,k}, \xi_{t,k}) / \nabla F_i(x_{s,k}, \xi_{s,k})\| \leq U$  (details in Appendix G).

**Corollary 4.1** (Convergence rate of FedPracIS). *Under Assumption 1-4, the expected norm of FedPracIS will be bounded as follows:*

$$\min_{t \in [T]} E \|\nabla f(x_t)\|^2 \leq \mathcal{O}\left(\frac{f^0 - f^*}{\sqrt{nKT}}\right) + \mathcal{O}\left(\frac{\sigma_L^2}{\sqrt{nKT}}\right) + \mathcal{O}\left(\frac{M^2}{T}\right) + \mathcal{O}\left(\frac{KU^2 \sigma_{G,s}^2}{\sqrt{nKT}}\right), \quad (17)$$

where  $M = \sigma_L^2 + 4K\sigma_{G,s}^2$ ,  $\sigma_{G,s}$  is the gradient dissimilarity bound of round  $s$ , and  $\|\nabla F_i(x_{t,k}, \xi_{t,k}) / \nabla F_i(x_{s,k}, \xi_{s,k})\| \leq U$  for all  $i$  and  $k$ .

**Corollary 4.2** (Convergence rate of FedPracDELTA). *Under Assumption 1-4, the expected norm of FedPracDELTA satisfies:*

$$\min_{t \in [T]} \mathbb{E} \|\nabla f(x_t)\|^2 \leq \mathcal{O}\left(\frac{f^0 - f^*}{\sqrt{nKT}}\right) + \mathcal{O}\left(\frac{\tilde{U}^2 \sigma_{L,s}^2}{\sqrt{nKT}}\right) + \mathcal{O}\left(\frac{\tilde{U}^2 \sigma_{L,s}^2 + 4K\tilde{U}^2 \zeta_{G,s}^2}{KT}\right), \quad (18)$$

where  $\tilde{U}$  is a constant that  $\|\nabla F_i(x_t) - \nabla f(x_t)\| / \|\nabla F_i(x_s) - \nabla f(x_s)\| \leq \tilde{U}_1 \leq \tilde{U}$  and  $\|\sigma_{L,t} / \sigma_{L,s}\| \leq \tilde{U}_2 \leq \tilde{U}$ , and  $\zeta_{G,s}$  is the gradient diversity bound of round  $s$  for all clients.

**Remark 4.3.** *The analysis of the FedPracIS and FedPracDELTA is independent of the unavailable information in the partial participation setting. The convergence rates are of the same order as that of our theoretical algorithm but with an added coefficient constant term that limits the gradient changing rate, as shown in Table 1.*

The complete derivation and discussion of the practical algorithm can be found in Appendix G.

## 5 Experiments

In this section, we evaluate the efficiency of the theoretical algorithm FedDELTA and the practical algorithm FedPracDELTA on various datasets.

**Datasets.** (1) We evaluate FedDELTA on synthetic data and split-FashionMNIST. The synthetic data follows  $y = \log((A_i x - b_i)^2 / 2)$  and "split" means letting 10% of clients own 90% of the data. (2) We evaluate FedPracDELTA on non-iid FashionMNIST, CIFAR-10 and LEAF [3]. Details of data generation and partitioning are provided in Appendix H.2.

**Baselines and Models.** We compare our algorithm, Fed(Prac)DELTA (Algorithm 1), with Fed(Prac)IS (Algorithm 2 in Appendix D), FedAVG [38], which uses random sampling, and Power-of-choice [7], which uses loss-based sampling and Cluster-based IS [52]. We utilize the regression model on synthetic data, the CNN model on Fashion-MNIST and Leaf, and the ResNet-18 on CIFAR-10. All algorithms are compared under the same experimental settings, such as lr and batch size. Full details of the sampling process of baselines and the setup of experiments are provided in Appendix H.2.

**Figure 4 illustrates the theoretical FedDELTA outperforms other biased and unbiased methods in convergence speed on synthetic datasets.** The superiority of the theoretical DELTA is also confirmed on split-FashionMNIST, as shown in Appendix H in Figure 12(a). Additional experimental results, which include a range of different choices of regression parameters  $A_i, b_i$ , noise  $\nu$ , and client numbers, are presented in Figure 9, Figure 10, and Figure 11 in Appendix H.3.



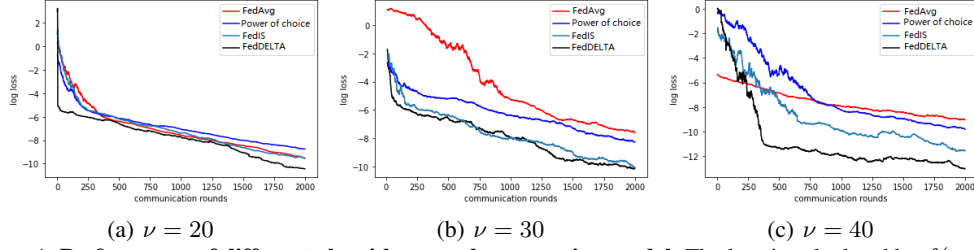

Figure 4: **Performance of different algorithms on the regression model.** The loss is calculated by  $f(x, y) = \|y - \log((A_i x - b_i)^2/2)\|^2$ ,  $A_i = 10$ ,  $b_i = 1$ . The logarithm of global loss is reported for various degrees of gradient noise,  $\nu$ , and all methods are well-tuned to yield the best results for each algorithm under each setting.

Table 2: **Performance of algorithms over various datasets.** We run 500 communication rounds on FashionMNIST, CIFAR-10, FEMNIST, and CelebA for each algorithm. We report the mean of maximum 5 accuracies for test datasets and the average number of communication rounds and time to reach the threshold accuracy.

| Algorithm        | FashionMNIST      |                    |                        | CIFAR-10          |                    |                       |
|------------------|-------------------|--------------------|------------------------|-------------------|--------------------|-----------------------|
|                  | Acc (%)           | Rounds for 70%     | Time (s) for 70%       | Acc (%)           | Rounds for 54%     | Time (s) for 54%      |
| FedAvg           | 70.35±0.51        | 426 (1.0×)         | 1795.12 (1.0×)         | 54.28±0.29        | 338 (1.0×)         | 3283.14 (1.0×)        |
| Cluster-based IS | 71.21±0.24        | 362 (1.17×)        | 1547.41 (1.16×)        | 54.83±0.02        | 323 (1.05×)        | 3188.54 (1.03×)       |
| FedPracIS        | 71.69±0.43        | 404 (1.05×)        | 1719.26 (1.04×)        | 55.05±0.27        | 313 (1.08×)        | 3085.05 (1.06×)       |
| FedPracDELTA     | <b>72.10±0.49</b> | <b>322 (1.32×)</b> | <b>1372.33 (1.31×)</b> | <b>55.20±0.26</b> | <b>303 (1.12×)</b> | <b>2989.98 (1.1×)</b> |

  

| Algorithm        | FEMNIST           |                   |                       | CelebA            |                    |                        |
|------------------|-------------------|-------------------|-----------------------|-------------------|--------------------|------------------------|
|                  | Acc (%)           | Rounds for 70%    | Time (s) for 70%      | Acc (%)           | Rounds for 85%     | Time (s) for 85%       |
| FedAvg           | 71.82±0.93        | 164 (1.0×)        | 330.02 (1.0×)         | 85.92±0.89        | 420 (1.0×)         | 3439.81 (1.0×)         |
| Cluster-based IS | 70.42±0.66        | 215 (0.76×)       | 453.56 (0.73×)        | 86.77±0.11        | 395 (1.06×)        | 3474.50 (1.01×)        |
| FedPracIS        | 80.11±0.29        | 110 (1.51×)       | 223.27 (1.48×)        | 88.12±0.71        | 327 (1.28×)        | 2746.82 (1.25×)        |
| FedPracDELTA     | <b>81.44±0.28</b> | <b>98 (1.67×)</b> | <b>198.95 (1.66×)</b> | <b>89.67±0.56</b> | <b>306 (1.37×)</b> | <b>2607.12 (1.32×)</b> |

Table 3: **Performance of sampling algorithms integration with other optimization methods on FEMNIST.** PracIS and PracDELTA are the sampling methods of Algorithm FedPracIS and FedPracDELTA, respectively, using the sampling probabilities defined in equations (15) and (16). For proximal and momentum methods, we use the default hyperparameter setting  $\mu = 0.01$  and  $\gamma = 0.9$ .

| Backbone with Sampling | Uniform Sampling |                | Cluster-based IS |                | PracIS     |                | PracDELTA         |                     |
|------------------------|------------------|----------------|------------------|----------------|------------|----------------|-------------------|---------------------|
|                        | Acc (%)          | Rounds for 80% | Acc (%)          | Rounds for 80% | Acc (%)    | Rounds for 80% | Acc (%)           | Rounds for 80%      |
| FedAvg                 | 71.82±0.93       | 164 (for 70%)  | 70.42±0.66       | 215 (for 70%)  | 80.11±0.29 | 110 (for 70%)  | <b>81.44±0.28</b> | <b>98 (for 70%)</b> |
| FedAvg + momentum      | 80.86±0.49       | 268            | 80.86±0.49       | 281            | 81.80±0.05 | 246            | <b>82.58±0.44</b> | <b>200</b>          |
| FedAvg + proximal      | 81.41±0.34       | 313            | 80.88±0.38       | 326            | 81.28±0.25 | 289            | <b>82.54±0.57</b> | <b>245</b>          |

Table 2 shows the FedPracDELTA has better performance in accuracy, communication rounds, and training wall-clock times. Notably, FedPracDELTA significantly accelerates convergence by requiring fewer training rounds and less time to achieve the threshold accuracy in FashionMNIST, CIFAR-10, FEMNIST, and CelebA. Additionally, on the natural federated dataset LEAF (FEMNIST and CelebA), our results demonstrate that both FedPracDELTA and FedPracIS exhibit substantial improvements over FedAvg. Figure 12(b) in Appendix H.3 illustrates the superior convergence of FedPracDELTA, showcasing the accuracy curves of sampling algorithms on FEMNIST.

Table 3 demonstrates that when compatible with momentum or proximal regularization, our method keeps its superiority in convergence. We combine various optimization methods such as proximal regularization [29], momentum [34], and VARP [18] with sampling algorithms to assess their performance on FEMNIST and FashionMNIST. Additional results for proximal and momentum on CIFAR-10, and for VARP on FashionMNIST, are available in Table 4 and Table 5 in Appendix H.3.

**Ablation studies.** We also provide ablation studies of heterogeneity  $\alpha$  in Table 6 and the impact of the number of sampled clients on accuracy in Figure 13 in Appendix H.3.

## 6 Conclusions, Limitations, and Future Works

This work studies the unbiased client sampling strategy to accelerate the convergence speed of FL by leveraging diverse clients. To address the prevalent issue of full-client gradient dependence in gradient-based FL [36, 4], we extend the theoretical algorithm DELTA to a practical version that utilizes information from the available clients.

Nevertheless, addressing the backdoor attack defense issue remains crucial in sampling algorithms. Furthermore, there is still significant room for developing an efficient and effective practical algorithm for gradient-based sampling methods. We will prioritize this as a future research direction.

## References

- [1] Guillaume Alain, Alex Lamb, Chinnadhurai Sankar, Aaron Courville, and Yoshua Bengio. Variance reduction in sgd by distributed importance sampling. *arXiv preprint arXiv:1511.06481*, 2015.
- [2] Ravikumar Balakrishnan, Tian Li, Tianyi Zhou, Nageen Himayat, Virginia Smith, and Jeff Bilmes. Diverse client selection for federated learning: Submodularity and convergence analysis. In *ICML 2021 International Workshop on Federated Learning for User Privacy and Data Confidentiality*, Virtual, July 2021.
- [3] Sebastian Caldas, Sai Meher Karthik Duddu, Peter Wu, Tian Li, Jakub Konečný, H Brendan McMahan, Virginia Smith, and Ameet Talwalkar. Leaf: A benchmark for federated settings. *arXiv preprint arXiv:1812.01097*, 2018.
- [4] Wenlin Chen, Samuel Horvath, and Peter Richtarik. Optimal client sampling for federated learning. *arXiv preprint arXiv:2010.13723*, 2020.
- [5] Wenlin Chen, Samuel Horváth, and Peter Richtárik. Optimal client sampling for federated learning. *Transactions on Machine Learning Research*, 2022.
- [6] Yae Jee Cho, Samarth Gupta, Gauri Joshi, and Osman Yağan. Bandit-based communication-efficient client selection strategies for federated learning. In *2020 54th Asilomar Conference on Signals, Systems, and Computers*, pages 1066–1069. IEEE, 2020.
- [7] Yae Jee Cho, Jianyu Wang, and Gauri Joshi. Towards understanding biased client selection in federated learning. In *International Conference on Artificial Intelligence and Statistics*, pages 10351–10375. PMLR, 2022.
- [8] Yongheng Deng, Feng Lyu, Ju Ren, Huaqing Wu, Yuezhi Zhou, Yaoyue Zhang, and Xuemin Shen. Auction: Automated and quality-aware client selection framework for efficient federated learning. *IEEE Transactions on Parallel and Distributed Systems*, 33(8):1996–2009, 2022.
- [9] Enmao Diao, Jie Ding, and Vahid Tarokh. Heterofl: Computation and communication efficient federated learning for heterogeneous clients. *arXiv preprint arXiv:2010.01264*, 2020.
- [10] Víctor Elvira and Luca Martino. Advances in importance sampling. *arXiv preprint arXiv:2102.05407*, 2021.
- [11] Maximilian Fiedler and Peter Gritzmman. Coresets for weight-constrained anisotropic assignment and clustering. *arXiv preprint arXiv:2203.10864*, 2022.
- [12] Yann Fraboni, Richard Vidal, Laetitia Kameni, and Marco Lorenzi. Clustered sampling: Low-variance and improved representativity for clients selection in federated learning, 2021.
- [13] Yann Fraboni, Richard Vidal, Laetitia Kameni, and Marco Lorenzi. A general theory for client sampling in federated learning. In *IJCAI 2022-31st International joint conference on artificial intelligence*, 2022.
- [14] Yann Fraboni, Richard Vidal, Laetitia Kameni, and Marco Lorenzi. A general theory for client sampling in federated learning. In *Trustworthy Federated Learning: First International Workshop, FL 2022, Held in Conjunction with IJCAI 2022, Vienna, Austria, July 23, 2022, Revised Selected Papers*, pages 46–58. Springer, 2023.
- [15] Yongxin Guo, Tao Lin, and Xiaoying Tang. Towards federated learning on time-evolving heterogeneous data. *arXiv preprint arXiv:2112.13246*, 2021.
- [16] Tzu-Ming Harry Hsu, Hang Qi, and Matthew Brown. Measuring the effects of non-identical data distribution for federated visual classification. *arXiv preprint arXiv:1909.06335*, 2019.
- [17] Tiansheng Huang, Weiwei Lin, Li Shen, Keqin Li, and Albert Y. Zomaya. Stochastic client selection for federated learning with volatile clients. *IEEE Internet of Things Journal*, 9(20):20055–20070, 2022.

- [18] Divyansh Jhunjhunwala, PRANAY SHARMA, Aushim Nagarkatti, and Gauri Joshi. Fedvarp: Tackling the variance due to partial client participation in federated learning. In *The 38th Conference on Uncertainty in Artificial Intelligence*, 2022.
- [19] Tyler B Johnson and Carlos Guestrin. Training deep models faster with robust, approximate importance sampling. *Advances in Neural Information Processing Systems*, 31:7265–7275, 2018.
- [20] Sai Praneeth Karimireddy, Martin Jaggi, Satyen Kale, Mehryar Mohri, Sashank J Reddi, Sebastian U Stich, and Ananda Theertha Suresh. Mime: Mimicking centralized stochastic algorithms in federated learning. *arXiv preprint arXiv:2008.03606*, 2020.
- [21] Sai Praneeth Karimireddy, Satyen Kale, Mehryar Mohri, Sashank Reddi, Sebastian Stich, and Ananda Theertha Suresh. Scaffold: Stochastic controlled averaging for federated learning. In *International Conference on Machine Learning*, pages 5132–5143. PMLR, 2020.
- [22] Angelos Katharopoulos and François Fleuret. Biased importance sampling for deep neural network training. *arXiv preprint arXiv:1706.00043*, 2017.
- [23] Angelos Katharopoulos and François Fleuret. Not all samples are created equal: Deep learning with importance sampling. In *International conference on machine learning*, pages 2525–2534. PMLR, 2018.
- [24] Ahmed Khaled and Peter Richtárik. Better theory for sgd in the nonconvex world. *arXiv preprint arXiv:2002.03329*, 2020.
- [25] Yeongwoo Kim, Ezeddin Al Hakim, Johan Haraldson, Henrik Eriksson, José Mairton B da Silva, and Carlo Fischione. Dynamic clustering in federated learning. In *ICC 2021-IEEE International Conference on Communications*, pages 1–6. IEEE, 2021.
- [26] Haneul Ko, Jaewook Lee, Sangwon Seo, Sangheon Pack, and Victor C. M. Leung. Joint client selection and bandwidth allocation algorithm for federated learning. *IEEE Transactions on Mobile Computing*, pages 1–1, 2021.
- [27] Anastasia Koloskova, Nicolas Loizou, Sadra Boreiri, Martin Jaggi, and Sebastian Stich. A unified theory of decentralized sgd with changing topology and local updates. In *International Conference on Machine Learning*, pages 5381–5393. PMLR, 2020.
- [28] Bo Li, Mikkel N Schmidt, Tommy S Alstrøm, and Sebastian U Stich. Partial variance reduction improves non-convex federated learning on heterogeneous data. *arXiv preprint arXiv:2212.02191*, 2022.
- [29] Tian Li, Anit Kumar Sahu, Manzil Zaheer, Maziar Sanjabi, Ameet Talwalkar, and Virginia Smith. Federated optimization in heterogeneous networks. *arXiv preprint arXiv:1812.06127*, 2018.
- [30] Tian Li, Anit Kumar Sahu, Manzil Zaheer, Maziar Sanjabi, Ameet Talwalkar, and Virginia Smith. Federated optimization in heterogeneous networks. *Proceedings of Machine learning and systems*, 2:429–450, 2020.
- [31] Xiang Li, Kaixuan Huang, Wenhao Yang, Shusen Wang, and Zhihua Zhang. On the convergence of fedavg on non-iid data. *arXiv preprint arXiv:1907.02189*, 2019.
- [32] Shiyun Lin, Yuze Han, Xiang Li, and Zhihua Zhang. Personalized federated learning towards communication efficiency, robustness and fairness. *Advances in Neural Information Processing Systems*, 2022.
- [33] Tao Lin, Lingjing Kong, Sebastian U Stich, and Martin Jaggi. Ensemble distillation for robust model fusion in federated learning. *arXiv preprint arXiv:2006.07242*, 2020.
- [34] Wei Liu, Li Chen, Yunfei Chen, and Wenyi Zhang. Accelerating federated learning via momentum gradient descent. *IEEE Transactions on Parallel and Distributed Systems*, 31(8):1754–1766, 2020.

- [35] Bing Luo, Wenli Xiao, Shiqiang Wang, Jianwei Huang, and Leandros Tassiulas. Tackling system and statistical heterogeneity for federated learning with adaptive client sampling. In *IEEE INFOCOM 2022-IEEE Conference on Computer Communications*, pages 1739–1748. IEEE, 2022.
- [36] Bing Luo, Wenli Xiao, Shiqiang Wang, Jianwei Huang, and Leandros Tassiulas. Tackling system and statistical heterogeneity for federated learning with adaptive client sampling. In *IEEE INFOCOM 2022 - IEEE Conference on Computer Communications*, pages 1739–1748, 2022.
- [37] Jiahua Ma, Xinghua Sun, Wenchao Xia, Xijun Wang, Xiang Chen, and Hongbo Zhu. Client selection based on label quantity information for federated learning. In *2021 IEEE 32nd Annual International Symposium on Personal, Indoor and Mobile Radio Communications (PIMRC)*, pages 1–6, 2021.
- [38] Brendan McMahan, Eider Moore, Daniel Ramage, Seth Hampson, and Blaise Aguera y Arcas. Communication-efficient learning of deep networks from decentralized data. In *Artificial intelligence and statistics*, pages 1273–1282. PMLR, 2017.
- [39] Aritra Mitra, Rayana Jaafar, George J Pappas, and Hamed Hassani. Achieving linear convergence in federated learning under objective and systems heterogeneity. *arXiv preprint arXiv:2102.07053*, 2021.
- [40] Ihab Mohammed, Shadha Tabatabai, Ala Al-Fuqaha, Faissal El Bouanani, Junaid Qadir, Basheer Qolomany, and Mohsen Guizani. Budgeted online selection of candidate iot clients to participate in federated learning. *IEEE Internet of Things Journal*, 8(7):5938–5952, 2021.
- [41] Mahdi Morafah, Saeed Vahidian, Weijia Wang, and Bill Lin. Flis: Clustered federated learning via inference similarity for non-iid data distribution. *IEEE Open Journal of the Computer Society*, 4:109–120, 2023.
- [42] Khalil Muhammad, Qinqin Wang, Diarmuid O’Reilly-Morgan, Elias Tragos, Barry Smyth, Neil Hurley, James Geraci, and Aonghus Lawlor. Fedfast: Going beyond average for faster training of federated recommender systems. In *Proceedings of the 26th ACM SIGKDD International Conference on Knowledge Discovery & Data Mining*, pages 1234–1242, 2020.
- [43] Kumar Kshitij Patel, Lingxiao Wang, Blake E Woodworth, Brian Bullins, and Nati Srebro. Towards optimal communication complexity in distributed non-convex optimization. *Advances in Neural Information Processing Systems*, 35:13316–13328, 2022.
- [44] Jake Perazzone, Shiqiang Wang, Mingyue Ji, and Kevin S. Chan. Communication-efficient device scheduling for federated learning using stochastic optimization. In *IEEE INFOCOM 2022 - IEEE Conference on Computer Communications*, pages 1449–1458, 2022.
- [45] Zhe Qu, Rui Duan, Lixing Chen, Jie Xu, Zhuo Lu, and Yao Liu. Context-aware online client selection for hierarchical federated learning, 2021.
- [46] Zhe Qu, Rui Duan, Lixing Chen, Jie Xu, Zhuo Lu, and Yao Liu. Context-aware online client selection for hierarchical federated learning. *IEEE Transactions on Parallel and Distributed Systems*, 33(12):4353–4367, 2022.
- [47] Sashank Reddi, Zachary Charles, Manzil Zaheer, Zachary Garrett, Keith Rush, Jakub Konečný, Sanjiv Kumar, and H Brendan McMahan. Adaptive federated optimization. *arXiv preprint arXiv:2003.00295*, 2020.
- [48] Monica Ribero and Haris Vikalo. Communication-efficient federated learning via optimal client sampling. *arXiv preprint arXiv:2007.15197*, 2020.
- [49] Elsa Rizk, Stefan Vlaski, and Ali H Sayed. Federated learning under importance sampling. *arXiv preprint arXiv:2012.07383*, 2020.
- [50] Yichen Ruan and Carlee Joe-Wong. Fedsoft: Soft clustered federated learning with proximal local updating. In *Proceedings of the AAAI Conference on Artificial Intelligence*, volume 36, pages 8124–8131, 2022.

- [51] Gaganpreet Sharma. Pros and cons of different sampling techniques. *International journal of applied research*, 3(7):749–752, 2017.
- [52] Guangyuan Shen, Dehong Gao, DuanXiao Song, Xukai Zhou, Shirui Pan, Wei Lou, Fang Zhou, et al. Fast heterogeneous federated learning with hybrid client selection. *arXiv preprint arXiv:2208.05135*, 2022.
- [53] Chengshuai Shi and Cong Shen. Federated multi-armed bandits. In *Proceedings of the AAAI Conference on Artificial Intelligence*, volume 35, pages 9603–9611, 2021.
- [54] Sebastian U Stich, Anant Raj, and Martin Jaggi. Safe adaptive importance sampling. *arXiv preprint arXiv:1711.02637*, 2017.
- [55] Canh T. Dinh, Nguyen Tran, and Josh Nguyen. Personalized federated learning with moreau envelopes. In H. Larochelle, M. Ranzato, R. Hadsell, M.F. Balcan, and H. Lin, editors, *Advances in Neural Information Processing Systems*, volume 33, pages 21394–21405. Curran Associates, Inc., 2020.
- [56] Steven K Thompson. Adaptive cluster sampling. *Journal of the American Statistical Association*, 85(412):1050–1059, 1990.
- [57] Alexander Tyurin and Peter Richtárik. A computation and communication efficient method for distributed nonconvex problems in the partial participation setting. *arXiv preprint arXiv:2205.15580*, 2022.
- [58] Jianyu Wang, Zachary Charles, Zheng Xu, Gauri Joshi, H Brendan McMahan, Maruan Al-Shedivat, Galen Andrew, Salman Avestimehr, Katharine Daly, Deepesh Data, et al. A field guide to federated optimization. *arXiv preprint arXiv:2107.06917*, 2021.
- [59] Jianyu Wang, Qinghua Liu, Hao Liang, Gauri Joshi, and H Vincent Poor. Tackling the objective inconsistency problem in heterogeneous federated optimization. *arXiv preprint arXiv:2007.07481*, 2020.
- [60] Shiqiang Wang and Mingyue Ji. A unified analysis of federated learning with arbitrary client participation. *arXiv preprint arXiv:2205.13648*, 2022.
- [61] Joel Wolfrath, Nikhil Sreekumar, Dhruv Kumar, Yuanli Wang, and Abhishek Chandra. Haccs: Heterogeneity-aware clustered client selection for accelerated federated learning. In *2022 IEEE International Parallel and Distributed Processing Symposium (IPDPS)*, pages 985–995, 2022.
- [62] Wenchao Xia, Tony QS Quek, Kun Guo, Wanli Wen, Howard H Yang, and Hongbo Zhu. Multi-armed bandit-based client scheduling for federated learning. *IEEE Transactions on Wireless Communications*, 19(11):7108–7123, 2020.
- [63] Han Xie, Jing Ma, Li Xiong, and Carl Yang. Federated graph classification over non-iid graphs. *Advances in neural information processing systems*, 34:18839–18852, 2021.
- [64] Xiaohui Xu, Sijing Duan, Jinrui Zhang, Yunzhen Luo, and Deyu Zhang. Optimizing federated learning on device heterogeneity with a sampling strategy. In *2021 IEEE/ACM 29th International Symposium on Quality of Service (IWQOS)*, pages 1–10, 2021.
- [65] Haibo Yang, Minghong Fang, and Jia Liu. Achieving linear speedup with partial worker participation in non-iid federated learning. *arXiv preprint arXiv:2101.11203*, 2021.
- [66] Hao Yu, Sen Yang, and Shenghuo Zhu. Parallel restarted sgd with faster convergence and less communication: Demystifying why model averaging works for deep learning. In *Proceedings of the AAAI Conference on Artificial Intelligence*, volume 33, pages 5693–5700, 2019.
- [67] Hangjia Zhang, Zhijun Xie, Roozbeh Zarei, Tao Wu, and Kewei Chen. Adaptive client selection in resource constrained federated learning systems: A deep reinforcement learning approach. *IEEE Access*, 9:98423–98432, 2021.
- [68] Xinwei Zhang, Mingyi Hong, Sairaj Dhople, Wotao Yin, and Yang Liu. Fedpd: A federated learning framework with optimal rates and adaptivity to non-iid data. *arXiv preprint arXiv:2005.11418*, 2020.

- 514 [69] Boxin Zhao, Ziqi Liu, Chaochao Chen, Mladen Kolar, Zhiqiang Zhang, and Jun Zhou. Adaptive  
515 client sampling in federated learning via online learning with bandit feedback. *arXiv preprint*  
516 *arXiv:2112.14332*, 2021.
- 517 [70] Peilin Zhao and Tong Zhang. Stochastic optimization with importance sampling for regularized  
518 loss minimization. In *international conference on machine learning*, pages 1–9. PMLR, 2015.
- 519 [71] Hongbin Zhu, Yong Zhou, Hua Qian, Yuanming Shi, Xu Chen, and Yang Yang. Online client  
520 selection for asynchronous federated learning with fairness consideration. *IEEE Transactions*  
521 *on Wireless Communications*, pages 1–1, 2022.

## 522 Contents of Appendix

|     |                                                                                     |           |
|-----|-------------------------------------------------------------------------------------|-----------|
| 523 | <b>A An Expanded Version of The Related Work</b>                                    | <b>15</b> |
| 524 | <b>B Toy Example and Experiments for Illustrating Our Observation</b>               | <b>16</b> |
| 525 | B.1 Toy example . . . . .                                                           | 16        |
| 526 | B.2 Experiments for illustrating our observation. . . . .                           | 17        |
| 527 | <b>C Techniques</b>                                                                 | <b>18</b> |
| 528 | <b>D Convergence of FedIS, Proof of Theorem 3.1</b>                                 | <b>20</b> |
| 529 | D.1 Proof for convergence rate of FedIS (Theorem 3.1) under Assumption 1–3. . . . . | 24        |
| 530 | <b>E Convergence of DELTA. Proof of Theorem 3.4</b>                                 | <b>25</b> |
| 531 | E.1 Convergence rate with improved analysis method for getting DELTA . . . . .      | 25        |
| 532 | E.2 Proof for Theorem E.2. . . . .                                                  | 27        |
| 533 | E.2.1 Sample with replacement . . . . .                                             | 27        |
| 534 | E.2.2 Sample without replacement . . . . .                                          | 31        |
| 535 | <b>F Proof of the Optimal Sampling Probability</b>                                  | <b>34</b> |
| 536 | F.1 Sampling probability FedIS . . . . .                                            | 34        |
| 537 | F.2 Sampling probability of DELTA . . . . .                                         | 34        |
| 538 | <b>G Convergence Analysis of The Practical Algorithm</b>                            | <b>35</b> |
| 539 | <b>H Additional Experiment Results and Experiment Details.</b>                      | <b>37</b> |
| 540 | H.1 Experimental Environment . . . . .                                              | 37        |
| 541 | H.2 Experiment setup . . . . .                                                      | 37        |
| 542 | H.3 Additional Experimental Results . . . . .                                       | 38        |

## 543 A An Expanded Version of The Related Work

544 FedAvg is proposed by [38] as a de facto algorithm of FL, in which multiple local SGD steps are  
545 executed on the available clients to alleviate the communication bottleneck. While communication  
546 efficient, heterogeneity, such as system heterogeneity [29, 31, 59, 39, 9], and statistical/objective  
547 heterogeneity [33, 21, 29, 59, 15], results in inconsistent optimization objectives and drifted clients  
548 models, impeding federated optimization considerably.

549 **Objective inconsistency in FL.** Several works also encounter difficulties from the objective  
550 inconsistency caused by partial client participation [31, 7, 2]. [31, 7] use the local-global gap  
551  $f^* - \frac{1}{m} \sum_{i=1}^m F_i^*$  to measure the distance between the global optimum and the average of all local  
552 personal optima, where the local-global gap results from objective inconsistency at the final optimal  
553 point. In fact, objective inconsistency occurs in each training round, not only at the final optimal  
554 point. [2] also encounter objective inconsistency caused by partial client participation. However,  
555 they use  $|\frac{1}{n} \sum_{i=1}^n \nabla F_i(x_t) - \nabla f(x_t)| \leq \epsilon$  as an assumption to describe such update inconsistency  
556 caused by objective inconsistency without any analysis on it. To date, the objective inconsistency  
557 caused by partial client participation has not been fully analyzed, even though it is prevalent in FL,  
558 even in homogeneous local updates. Our work provides a fundamental convergence analysis on the  
559 influence of the objective inconsistency of partial client participation.

560 **Client selection in FL.** In general, sampling methods in federated learning (FL) can be classified  
561 as biased or unbiased. Unbiased sampling guarantees that the expected value of client aggregation  
562 is equal to that of global deterministic aggregation when all clients participate. Conversely, biased  
563 sampling may result in suboptimal convergence. A prominent example of unbiased sampling in FL  
564 is multinomial sampling (MD), which samples clients based on their data ratio [59, 12]. Additionally,  
565 importance sampling (IS), an unbiased sampling method, has been utilized in FL to reduce  
566 convergence variance. For instance, [4] use update norm as an indicator of importance to sample  
567 clients, [49] sample clients based on data variability, and [40] use test accuracy as an estimation of  
568 importance. Meanwhile, various biased sampling strategies have been proposed to speed up training,  
569 such as selecting clients with higher loss [7], as many clients as possible under a threshold [45], clients



with larger updates [48], and greedily sampling based on gradient diversity [2]. However, these biased sampling methods can exacerbate the negative effects of objective inconsistency and only converge to a neighboring optimal solution. Another line of research focuses on reinforcement learning for client sampling, treating each client as an agent and aiming to find the optimal action [69, 62, 6, 53, 67]. There are also works that consider online FL, in which the client selection must consider the client's connection ability [44, 17, 26, 71, 46, 8]. Recently, cluster-based client selection has gained some attention in FL [12, 64, 42, 52, 37, 50, 25, 41, 61]. Though clustering adds additional computation and memory overhead, [12, 52] show that it is helpful for sampling diverse clients and reducing variance. Although some studies employ adaptive cluster-based IS to address the issue of slow convergence due to small gradient groups [52, 11], these approaches differ from our method as they still require an additional clustering operation. The proposed DELTA<sup>2</sup> in Algorithm 1 can be viewed as a muted version of the diverse client clustering algorithm, while promising to be unbiased.

**Importance sampling.** Importance sampling is a statistical method that allows for the estimation of certain quantities by sampling from a distribution that is different from the distribution of interest. It has been applied in a wide range of areas, including Monte Carlo integration [10, 70, 1], Bayesian inference [22, 23], and machine learning [54, 19].

In a recent parallel work, [49] demonstrated mean square convergence of strongly convex federated learning under the assumption of a bounded distance between the global optimal model and the local optimal models.[4] analyzed the convergence of strongly convex and nonconvex federated learning by studying the improvement factor, which is the ratio of the participation variance using importance sampling and the participation variance using uniform sampling. This algorithm dynamically selects clients without any constraints on the number of clients, potentially violating the principle of partial user participation. It is worth noting that both of these sampling methods are based on the gradient norm, ignoring the effect of the direction of the gradient. Other works have focused on the use of importance sampling in the context of online federated learning, where the client selection must consider the client's connection ability. For example, [69] proposed an adaptive client selection method based on reinforcement learning, which takes into account the communication cost and the accuracy of the local model when selecting clients to participate in training. [62] also employed reinforcement learning for adaptive client selection, treating each client as an agent and aiming to find the optimal action that maximizes the accuracy of the global model.[6] introduced a bandit-based federated learning algorithm that uses importance sampling to select the most informative clients in a single communication round. [53] considered the problem of federated learning with imperfect feedback, where the global model is updated based on noisy and biased local gradients, and proposed an importance sampling method to adjust for the bias and reduce the variance of convergence.

## B Toy Example and Experiments for Illustrating Our Observation

### B.1 Toy example

Figure 5 is a separate illustrated version of each sampling algorithm provided in Figure 3.

We consider a regression problem involving three clients, each with a unique square function:  $F_1(x, y) = x^2 + y^2$ ;  $F_2(x, y) = 4(x - \frac{1}{2})^2 + \frac{1}{2}y^2$ ;  $F_3(x, y) = 3x^2 + \frac{3}{2}(y - 2)^2$ . Suppose  $(x_t, y_t) = (1, 1)$  at current round  $t$ , the gradients of three clients are  $\nabla F_1 = (2, 2)$ ,  $\nabla F_2 = (4, 1)$ , and  $\nabla F_3 = (6, -3)$ . Suppose only two clients are selected to participate in training. The closer the selected user's update is to the global model, the better.

For ideal global model,  $\nabla F_{global} = \frac{1}{3} \sum_{i=1}^3 \nabla F_i = (4, 0)$ , which is the average over all clients.

For FedIS,  $\nabla F_{FedIS} = \frac{1}{2}(\nabla F_2 + \nabla F_3) = (5, -1)$ : It tends to select Client 2 and 3 who have large gradient norms, as  $\|\nabla F_3\| > \|\nabla F_2\| > \|\nabla F_1\|$ .

For DELTA,  $\nabla F_{DELTA} = \frac{1}{2}(\nabla F_1 + \nabla F_3) = (4, -\frac{1}{2})$ : It tends to select Client 1 and 3 who have the largest gradient diversity than that of other clients pair, where the gradient diversity can be formulated by  $div_i = \|\nabla F_i(x_t, y_t) - \nabla F_{global}(x_t, y_t)\|$  [55, 32].

<sup>2</sup>With a slight abuse of the name, we use DELTA for the rest of the paper to denote either the sampling probability or the federated learning algorithm with sampling probability DELTA, as does FedIS.

618 For FedAvg,  $\nabla F_{FedAvg} = \frac{1}{2}(\nabla F_1 + \nabla F_2) = (3, \frac{3}{2})$ : It assigns each client with equal sampling  
619 probability. Compared to FedIS and DELTA, FedAvg is more likely to select Client 1 and 2. To  
620 facilitate the comparison, FedAvg is assumed to select Client 1 and 2 here.

621 From Figure 3, we can observe that the gradient produced by DELTA is closest to that of  
622 the ideal global model. Specifically, using  $L2$  norm as the distance function  $\mathcal{D}$ , we have  
623  $\mathcal{D}(\nabla F_{DELTA}, \nabla F_{global}) < \mathcal{D}(\nabla F_{FedIS}, \nabla F_{global}) < \mathcal{D}(\nabla F_{FedAvg}, \nabla F_{global})$ . This illustrates  
624 the selection of more diverse clients better approaches the ideal global model, thereby making it more  
625 efficient.

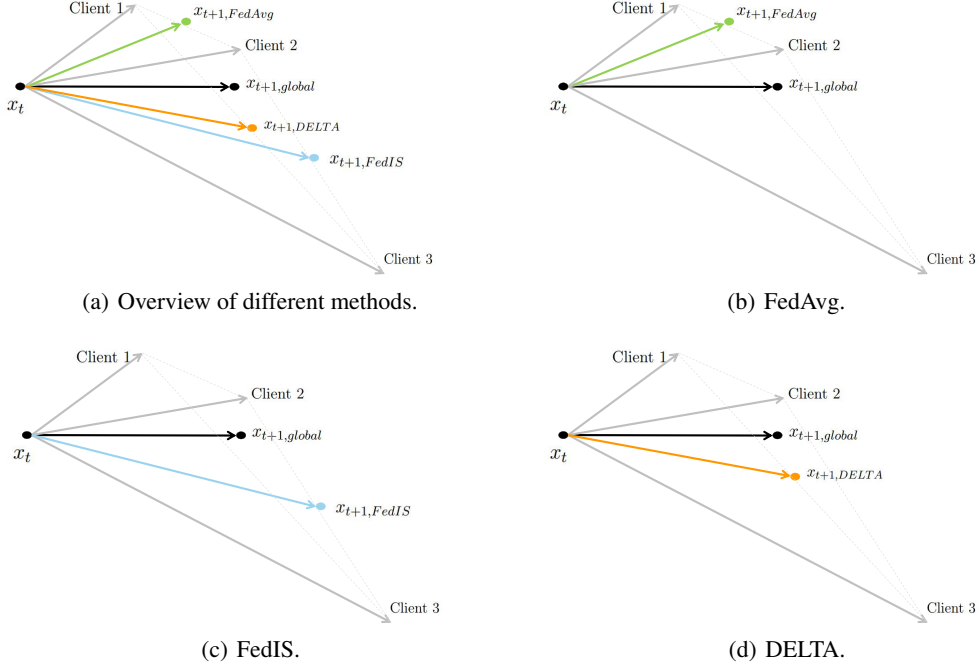

Figure 5: **Overview of objective inconsistency.** The intuition of objective inconsistency in FL is caused by client sampling. When Client 1 & 2, are selected to participate the training, then the model  $x^{t+1}$  becomes  $x_{FedAvg}^{t+1}$  instead of  $x_{global}^{t+1}$ , resulting in *objective inconsistency*. Different sampling strategies can cause different surrogate objectives, thus causing different biases. From Fig 5(a) we can see DELTA achieves minimal bias among the three unbiased sampling methods.

## 626 B.2 Experiments for illustrating our observation.

627 **Experiment setting.** For the experiments to illustrate our observation in the introduction, we apply a  
628 logistic regression model on the non-iid MNIST dataset. 10 clients are selected from 200 clients to  
629 participate in training in each round. We set 2 cluster centers for cluster-based IS. And we set the  
630 mini batch-size to 32, the learning rate to 0.01, and the local update time to 5 for all methods. We  
631 run 500 communication rounds for each algorithm. We report the average of each round’s selected  
632 clients’ gradient norm and the minimum of each round’s selected clients’ gradient norm.

633 **Performance of gradient norm.** We report the gradient norm performance of cluster-based IS  
634 and IS to show that cluster-based IS selects clients with small gradients. As we mentioned in the  
635 introduction, the cluster-based IS always selects some clients from the cluster with small gradients,  
636 which will slow the convergence in some cases. We provide the average gradient norm comparison  
637 between IS and cluster-based IS in Figure 6(a). In addition, we also provide the minimal gradient  
638 norm comparison between IS and cluster-based IS in Figure 6(b).

639 **Performance of removing small gradient clusters.** We report on a comparison of the accuracy and  
640 loss performance between vanilla cluster-based IS and the removal of cluster-based IS with small  
641 gradient clusters. Specifically, we consider a setting with two cluster centers. After 250 rounds,  
642 we replace the clients in the cluster containing the smaller gradient with the clients in the cluster  
643 containing the larger gradient while maintaining the same total number of participating clients. The  
644 experimental results are shown in Figure 7. We can observe that vanilla cluster-based IS performs

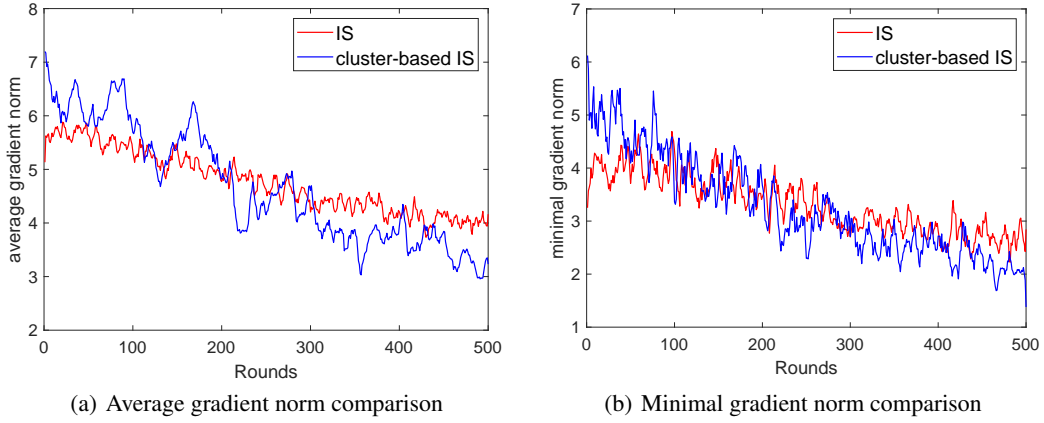

Figure 6: **The gradient norm comparison.** Both results indicate that cluster-based IS selects clients with small gradients after about half of the training rounds compared to IS.

645 worse than cluster-based IS without small gradients, indicating that small gradients are a contributing  
 646 factor to poor performance.

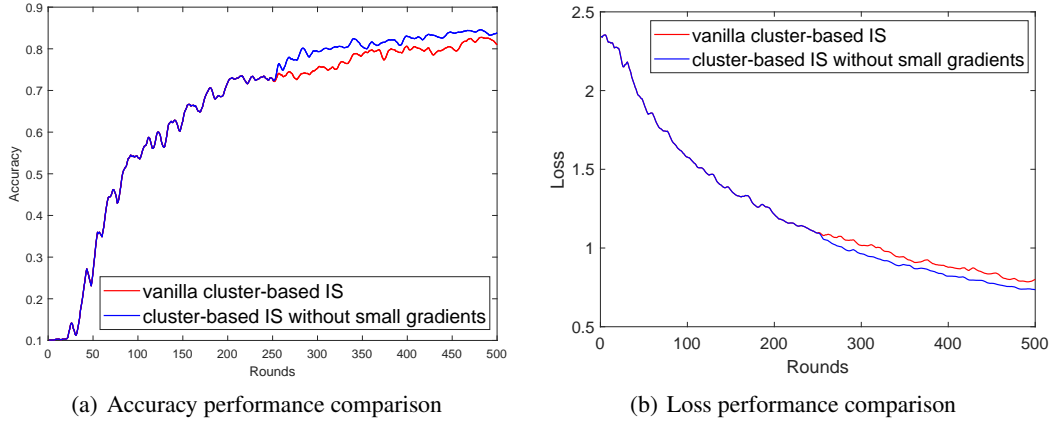

Figure 7: **An illustration that cluster-based IS sampling from the cluster with small gradients will slow convergence.** When the small gradient-norm cluster’s clients are replaced by the clients from the large gradient-norm cluster, we see the performance improvement of cluster-based IS.

## 647 C Techniques

648 Here, we present some technical lemmas that are useful in the theoretical proof. We substitute  $\frac{1}{m}$  for  
 649  $\frac{n_i}{N}$  to simplify the writing in all subsequent proofs.  $\frac{n_i}{N}$  is the data ratio of client  $i$ . All of our proofs  
 650 can be easily extended from  $f(x_t) = \frac{1}{m} \sum_{i=1}^m F_i(x_t)$  to  $f(x_t) = \sum_{i=1}^m \frac{n_i}{N} F_i(x_t)$ .

651 **Lemma C.1.** (*Unbiased Sampling*). *Importance sampling is unbiased sampling.*  
 652  $\mathbb{E}(\frac{1}{n} \sum_{i \in S_t} \frac{1}{m p_i} \nabla F_i(x_t)) = \frac{1}{m} \sum_{i=1}^m \nabla F_i(x_t)$ , no matter whether the sampling is with  
 653 replacement or without replacement.

654 Lemma C.1 proves that the importance sampling is an unbiased sampling strategy, either in sampling  
 655 with replacement or sampling without replacement.

656 *Proof.* For with replacement:

$$\begin{aligned}\mathbb{E}\left(\frac{1}{n}\sum_{i \in S_t} \frac{1}{mp_i^t} \nabla F_i(x_t)\right) &= \frac{1}{n} \sum_{i \in S_t} \mathbb{E}\left(\frac{1}{mp_i^t} \nabla F_i(x_t)\right) = \frac{1}{n} \sum_{i \in S_t} \mathbb{E}\left(\mathbb{E}\left(\frac{1}{mp_i^t} \nabla F_i(x_t) \mid S\right)\right) \\ &= \frac{1}{n} \sum_{i \in S_t} \mathbb{E}\left(\sum_{l=1}^m p_l^t \frac{1}{mp_l^t} \nabla F_l(x_t)\right) = \frac{1}{n} \sum_{i \in S_t} \nabla f(x_t) = \nabla f(x_t),\end{aligned}\tag{19}$$

657 For without replacement:

$$\begin{aligned}\mathbb{E}\left(\frac{1}{n}\sum_{i \in S_t} \frac{1}{mp_i^t} \nabla F_i(x_t)\right) &= \frac{1}{n} \sum_{l=1}^m \mathbb{E}\left(\mathbb{I}_m \frac{1}{mp_l^t} \nabla F_l(x_t)\right) = \frac{1}{n} \sum_{l=1}^m \mathbb{E}(\mathbb{I}_m) \times \mathbb{E}\left(\frac{1}{mp_l^t} \nabla F_l(x_t)\right) \\ &= \frac{1}{n} \mathbb{E}\left(\sum_{l=1}^m \mathbb{I}_m\right) \times \mathbb{E}\left(\frac{1}{mp_l^t} \nabla F_l(x_t)\right) = \frac{1}{n} n \times \sum_{l=1}^m p_l^t \frac{1}{mp_l^t} \nabla F_l(x_t) \\ &= \frac{1}{n} \sum_{l=1}^m np_l^t \times \frac{1}{mp_l^t} \nabla F_l(x_t) = \frac{1}{m} \sum_{l=1}^m \nabla F_l(x_t) = \nabla f(x_t),\end{aligned}\tag{20}$$

658 where  $\mathbb{I}_m \triangleq \begin{cases} 1 & \text{if } x_l \in S_t, \\ 0 & \text{otherwise.} \end{cases}$

659 In the expectation, there are three sources of stochasticity. They are client sampling, local SGD, and  
660 the filtration of  $x_t$ . Therefore, the expectation is taken over all of these sources of randomness. Here,  
661  $S$  represents the sources of stochasticity other than client sampling. More precisely,  $S$  represents the  
662 filtration of the stochastic process  $x_j, j = 1, 2, 3, \dots$  at time  $t$  and the stochasticity of local SGD.  $\square$

**Lemma C.2** (update gap bound).

$$\chi^2 = \mathbb{E}\left\|\frac{1}{n}\sum_{i \in S_t} \frac{1}{mp_i^t} \nabla F_i(x_t) - \nabla f(x_t)\right\|^2 = \mathbb{E}\|\nabla \tilde{f}(x_t)\|^2 - \|\nabla f(x_t)\|^2 \leq \mathbb{E}\|\nabla \tilde{f}(x_t)\|^2.\tag{21}$$

663 where the first equation follows from  $\mathbb{E}[x - \mathbb{E}(x)]^2 = \mathbb{E}[x^2] - [\mathbb{E}(x)]^2$  and Lemma C.1.

664 For ease of understanding, we give a detailed derivation of the Lemma C.2.

$$\begin{aligned}\mathbb{E}\left(\|\nabla \tilde{f}(x_t) - \nabla f(x_t)\|^2 \mid S\right) &= \mathbb{E}\left(\|\nabla \tilde{f}(x_t)\|^2 \mid S\right) - 2\mathbb{E}\left(\|\nabla \tilde{f}(x_t)\| \|\nabla f(x_t)\| \mid S\right) \\ &\quad + \mathbb{E}\left(\|\nabla f(x_t)\|^2 \mid S\right),\end{aligned}\tag{22}$$

665 where  $\mathbb{E}(x \mid S)$  means the expectation on  $x$  over the sampling space. We have  $\mathbb{E}\left(\|\nabla \tilde{f}(x_t) \mid S\right) =$   
666  $\nabla f(x_t)$  and  $\mathbb{E}\left(\|\nabla f(x_t)\|^2 \mid S\right) = \|\nabla f(x_t)\|^2$  ( $\|\nabla f(x)\|$  is a constant for stochasticity  $S$  and the  
667 expectation over a constant is the constant itself.)  
668 Therefore, we conclude

$$\mathbb{E}\left(\|\nabla \tilde{f}(x_t) - \nabla f(x_t)\|^2 \mid S\right) = \mathbb{E}\left(\|\nabla \tilde{f}(x_t)\|^2 \mid S\right) - \|\nabla f(x_t)\|^2 \leq \mathbb{E}\left(\|\nabla \tilde{f}(x_t)\|^2 \mid S\right).\tag{23}$$

669 We can further take the expectation on both sides of the inequality according to our needs, without  
670 changing the relationship.

671 The following lemma follows from Lemma 4 of [47], but with a looser condition Assumption 3,  
672 instead of  $\sigma_G^2$  bound. With some effort, we can derive the following lemma:

673 **Lemma C.3** (Local updates bound.). For any step-size satisfying  $\eta_L \leq \frac{1}{8LK}$ , we can have the  
674 following results:

$$\mathbb{E}\|x_{i,k}^t - x_t\|^2 \leq 5K(\eta_L^2 \sigma_L^2 + 4K\eta_L^2 \sigma_G^2) + 20K^2(A^2 + 1)\eta_L^2 \|\nabla f(x_t)\|^2.\tag{24}$$

*Proof.*

$$\begin{aligned}
& \mathbb{E}_t \|x_{t,k}^i - x_t\|^2 \\
&= \mathbb{E}_t \|x_{t,k-1}^i - x_t - \eta_L g_{t,k-1}^t\|^2 \\
&= \mathbb{E}_t \|x_{t,k-1}^i - x_t - \eta_L (g_{t,k-1}^t - \nabla F_i(x_{t,k-1}^i) + \nabla F_i(x_{t,k-1}^i) - \nabla F_i(x_t) + \nabla F_i(x_t))\|^2 \\
&\leq (1 + \frac{1}{2K-1}) \mathbb{E}_t \|x_{t,k-1}^i - x_t\|^2 + \mathbb{E}_t \|\eta_L (g_{t,k-1}^t - \nabla F_i(x_{t,k-1}^i))\|^2 \\
&\quad + 4K \mathbb{E}_t [\|\eta_L (\nabla F_i(x_{t,k-1}^i) - \nabla F_i(x_t))\|^2] + 4K \eta_L^2 \mathbb{E}_t \|\nabla F_i(x_t)\|^2 \\
&\leq (1 + \frac{1}{2K-1}) \mathbb{E}_t \|x_{t,k-1}^i - x_t\|^2 + \eta_L^2 \sigma_L^2 + 4K \eta_L^2 L^2 \mathbb{E}_t \|x_{t,k-1}^i - x_t\|^2 \\
&\quad + 4K \eta_L^2 \sigma_G^2 + 4K \eta_L^2 (A^2 + 1) \|\nabla f(x_t)\|^2 \\
&\leq (1 + \frac{1}{K-1}) \mathbb{E}_t \|x_{t,k-1}^i - x_t\|^2 + \eta_L^2 \sigma_L^2 + 4K \eta_L^2 \sigma_G^2 + 4K (A^2 + 1) \|\eta_L \nabla f(x_t)\|^2. \tag{25}
\end{aligned}$$

Unrolling the recursion, we obtain:

$$\begin{aligned}
& \mathbb{E}_t \|x_{t,k}^i - x_t\|^2 \leq \sum_{p=0}^{k-1} (1 + \frac{1}{K-1})^p [\eta_L^2 \sigma_L^2 + 4K \eta_L^2 \sigma_G^2 + 4K (A^2 + 1) \|\eta_L \nabla f(x_t)\|^2] \\
&\leq (K-1) \left[ (1 + \frac{1}{K-1})^K - 1 \right] [\eta_L^2 \sigma_L^2 + 4K \eta_L^2 \sigma_G^2 + 4K (A^2 + 1) \|\eta_L \nabla f(x_t)\|^2] \\
&\leq 5K (\eta_L^2 \sigma_L^2 + 4K \eta_L^2 \sigma_G^2) + 20K^2 (A^2 + 1) \eta_L^2 \|\nabla f(x_t)\|^2. \tag{26}
\end{aligned}$$

□

In the following Proposition, we will demonstrate that the convergence rate in this paper with the relaxed version of Assumption 3 remains unchanged.

**Proposition C.4** (convergence under relaxed Assumption 3 [24]). *The relaxed version of Assumption 3 in this paper is:*

$$\mathbb{E} \|\nabla F_i(x)\|^2 \leq 2B(f(x) - f^{inf}) + (A^2 + 1) \|\nabla f(x)\|^2 + \sigma_G^2. \tag{27}$$

Since we have  $f(x) - f^{inf} \leq f^0 - f^{inf} \leq F$ , where  $F$  is a positive constant. This implies that we can substitute  $\sigma_g$  with  $2BF + \sigma_G$  in all analyses without altering the outcomes (one can directly conclude this from using the above bound in Lemma C.3). In the final convergence rate, it is straightforward to see that the convergence rate remains unchanged, yet the constant term  $\sigma_g$  becomes  $2BF + \sigma_G$ .

Thus, we can assert that we have furnished the analysis under the relaxed assumption condition.

## D Convergence of FedIS, Proof of Theorem 3.1

The complete version of FedIS algorithm is shown below:

We first restate the convergence theorem (Theorem 3.1) more formally, then prove the result for the nonconvex case.

**Theorem D.1.** *Under Assumptions 1–3 and the sampling strategy FedIS, the expected gradient norm will converge to a stationary point of the global objective. More specifically, if the number of communication rounds  $T$  is predetermined and the learning rate  $\eta$  and  $\eta_L$  are constant, then the expected gradient norm will be bounded as follows:*

$$\min_{t \in [T]} \mathbb{E} \|\nabla f(x_t)\|^2 \leq \frac{F}{c\eta\eta_L KT} + \Phi, \tag{28}$$

where  $F = f(x_0) - f(x_*)$ ,  $M^2 = \sigma_L^2 + 4K\sigma_G^2$ , and the expectation is over the local datasets samples among workers.

---

**Algorithm 2 FedIS and FedPracIS** : Federated learning with importance sampling
 

---

**Require:** initial weights  $x_0$ , global learning rate  $\eta$ , local learning rate  $\eta_L$ , number of training rounds  $T$

**Ensure:** trained weights  $x_T$

```

1: for round  $t = 1, \dots, T$  do
2:   Select clients by using IS (5) or Practical IS (15) .
3:   for each worker  $i \in S_t$ , in parallel do
4:      $x_{t,0}^i = x_t$ 
5:     for  $k = 0, \dots, K-1$  do
6:       compute  $g_{t,k}^i = \nabla F_i(x_{t,k}^i, \xi_{t,k}^i)$ 
7:       Local update:  $x_{t,k+1}^i = x_{t,k}^i - \eta_L g_{t,k}^i$ 
8:       Let  $\Delta_t^i = x_{t,K}^i - x_{t,0}^i = -\eta_L \sum_{k=0}^{K-1} g_{t,k}^i$ 
9:       Send gradient to server
10:    At Server:
11:    Receive  $\Delta_t^i, i \in S_t$ 
12:    let  $\Delta_t = \frac{1}{|S_t|} \sum_{i \in S_t} \frac{n_i}{np_i^t} \Delta_t^i$ 
13:    Server update:  $x_{t+1} = x_t + \eta \Delta_t$ 
14:    Broadcast  $x_{t+1}$  to clients
  
```

---

696 Let  $\eta_L < \min(1/(8LK), C)$ , where  $C$  is obtained from the condition that  $\frac{1}{2} - 10L^2K^2(A^2 +$   
 697  $1)\eta_L^2 - \frac{L^2\eta K(A^2+1)}{2n}\eta_L > 0$ , and  $\eta \leq 1/(\eta_L L)$ , it then holds that:

$$\Phi = \frac{1}{c} \left[ \frac{5\eta_L^2 L^2 K}{2m} \sum_{i=1}^m (\sigma_L^2 + 4K\sigma_G^2) + \frac{\eta\eta_L L}{2m} \sigma_L^2 + \frac{L\eta\eta_L}{2nK} V\left(\frac{1}{mp_i^t} \hat{g}_i^t\right) \right]. \quad (29)$$

698 where  $c$  is a constant that satisfies  $\frac{1}{2} - 10L^2K^2(A^2 + 1)\eta_L^2 - \frac{L^2\eta K(A^2+1)}{2n}\eta_L > c > 0$ , and  
 699  $V\left(\frac{1}{mp_i^t} \hat{g}_i^t\right) = E\left\| \frac{1}{mp_i^t} \hat{g}_i^t - \frac{1}{m} \sum_{i=1}^m \hat{g}_i^t \right\|^2$ .

700 **Corollary D.2.** Suppose  $\eta_L$  and  $\eta$  are such that the conditions mentioned above are satisfied,  
 701  $\eta_L = \mathcal{O}\left(\frac{1}{\sqrt{TKL}}\right)$  and  $\eta = \mathcal{O}\left(\sqrt{Kn}\right)$ , and let the sampling probability be FedIS (75). Then for  
 702 sufficiently large  $T$ , the iterates of Theorem 3.1 satisfy:

$$\min_{t \in [T]} \mathbb{E} \|\nabla f(x_t)\|^2 = \mathcal{O} \left( \frac{\sigma_L^2}{\sqrt{nKT}} + \frac{K\sigma_G^2}{\sqrt{nKT}} + \frac{\sigma_L^2 + 4K\sigma_G^2}{KT} \right). \quad (30)$$

*Proof.*

$$\begin{aligned}
 \mathbb{E}_t[f(x_{t+1})] &\stackrel{(a1)}{\leq} f(x_t) + \langle \nabla f(x_t), \mathbb{E}_t[x_{t+1} - x_t] \rangle + \frac{L}{2} \mathbb{E}_t[\|x_{t+1} - x_t\|^2] \\
 &= f(x_t) + \langle \nabla f(x_t), \mathbb{E}_t[\eta \Delta_t + \eta\eta_L K \nabla f(x_t) - \eta\eta_L K \nabla f(x_t)] \rangle + \frac{L}{2} \eta^2 \mathbb{E}_t[\|\Delta_t\|^2] \\
 &= f(x_t) - \underbrace{\eta\eta_L K \|\nabla f(x_t)\|^2}_{A_1} + \underbrace{\eta \langle \nabla f(x_t), \mathbb{E}_t[\Delta_t + \eta_L K \nabla f(x_t)] \rangle}_{A_2} + \frac{L}{2} \eta^2 \mathbb{E}_t[\|\Delta_t\|^2],
 \end{aligned} \quad (31)$$

703 where (a1) follows from the Lipschitz continuous condition. The expectation is conditioned on  
 704 everything prior to the current step  $k$  of round  $t$ . Specifically, it is taken over the sampling of clients,  
 705 the sampling of local data, and the current round's model  $x_t$ .

706 Firstly we consider  $A_1$ :

$$\begin{aligned}
A_1 &= \langle \nabla f(x_t), \mathbb{E}_t[\Delta_t + \eta_L K \nabla f(x_t)] \rangle \\
&= \left\langle \nabla f(x_t), \mathbb{E}_t \left[ -\frac{1}{|S_t|} \sum_{i \in S_t} \frac{1}{mp_i^t} \sum_{k=0}^{K-1} \eta_L g_{t,k}^i + \eta_L K \nabla f(x_t) \right] \right\rangle \\
&\stackrel{(a2)}{=} \left\langle \nabla f(x_t), \mathbb{E}_t \left[ -\frac{1}{m} \sum_{i=1}^m \sum_{k=0}^{K-1} \eta_L \nabla F_i(x_{t,k}^i) + \eta_L K \nabla f(x_t) \right] \right\rangle \\
&= \left\langle \sqrt{\eta_L K} \nabla f(x_t), -\frac{\sqrt{\eta_L}}{\sqrt{K}} \mathbb{E}_t \left[ \frac{1}{m} \sum_{i=1}^m \sum_{k=0}^{K-1} (\nabla F_i(x_{t,k}^i) - \nabla F_i(x_t)) \right] \right\rangle \\
&\stackrel{(a3)}{=} \frac{\eta_L K}{2} \|\nabla f(x_t)\|^2 + \frac{\eta_L}{2K} \mathbb{E}_t \left\| \frac{1}{m} \sum_{i=1}^m \sum_{k=0}^{K-1} (\nabla F_i(x_{t,k}^i) - \nabla F_i(x_t)) \right\|^2 \\
&\quad - \frac{\eta_L}{2K} \mathbb{E}_t \left\| \frac{1}{m} \sum_{i=1}^m \sum_{k=0}^{K-1} \nabla F_i(x_{t,k}^i) \right\|^2 \\
&\stackrel{(a4)}{\leq} \frac{\eta_L K}{2} \|\nabla f(x_t)\|^2 + \frac{\eta_L L^2}{2m} \sum_{i=1}^m \sum_{k=0}^{K-1} \mathbb{E}_t \|x_{t,k}^i - x_t\|^2 - \frac{\eta_L}{2K} \mathbb{E}_t \left\| \frac{1}{m} \sum_{i=1}^m \sum_{k=0}^{K-1} \nabla F_i(x_{t,k}^i) \right\|^2 \\
&\leq \left( \frac{\eta_L K}{2} + 10K^3 L^2 \eta_L^3 (A^2 + 1) \right) \|\nabla f(x_t)\|^2 + \frac{5L^2 \eta_L^3}{2} K^2 \sigma_L^2 + 10\eta_L^3 L^2 K^3 \sigma_G^2 \\
&\quad - \frac{\eta_L}{2K} \mathbb{E}_t \left\| \frac{1}{m} \sum_{i=1}^m \sum_{k=0}^{K-1} \nabla F_i(x_{t,k}^i) \right\|^2, \tag{32}
\end{aligned}$$

707 where (a2) follows from Assumption 2 and LemmaC.1. (a3) is due to  $\langle x, y \rangle =$   
708  $\frac{1}{2} [\|x\|^2 + \|y\|^2 - \|x - y\|^2]$  and (a4) comes from Assumption 1.

709 Then we consider  $A_2$ . Let  $\hat{g}_i^t = \sum_{k=0}^{K-1} g_{i,k}^t = \sum_{k=0}^{K-1} \nabla F_i(x_{t,k}^i, \xi_{t,k}^i)$

$$\begin{aligned}
A_2 &= \mathbb{E}_t \|\Delta_t\|^2 \\
&= \mathbb{E}_t \left\| \eta_L \frac{1}{n} \sum_{i \in S_t} \frac{1}{mp_i^t} \sum_{k=0}^{K-1} g_{t,k}^i \right\|^2 \\
&= \eta_L^2 \frac{1}{n} \mathbb{E}_t \left\| \frac{1}{mp_i^t} \sum_{k=0}^{K-1} g_{t,k}^i - \frac{1}{m} \sum_{i=1}^m \sum_{k=0}^{K-1} g_{t,k}^i \right\|^2 \\
&\quad + \eta_L^2 \mathbb{E}_t \left\| \frac{1}{m} \sum_{i=1}^m \sum_{k=0}^{K-1} g_i(x_{t,k}^i) \right\|^2 \\
&= \frac{\eta_L^2}{n} V\left(\frac{1}{mp_i^t} \hat{g}_i^t\right) \\
&\quad + \eta_L^2 \mathbb{E} \left\| \frac{1}{m} \sum_{i=1}^m \sum_{k=0}^{K-1} [g_i(x_{t,k}^i) - \nabla F_i(x_{t,k}^i) + \nabla F_i(x_{t,k}^i)] \right\|^2 \\
&\leq \frac{\eta_L^2}{n} V\left(\frac{1}{mp_i^t} \hat{g}_i^t\right) \\
&\quad + \eta_L^2 \frac{1}{m^2} \sum_{i=1}^m \sum_{k=0}^{K-1} \mathbb{E} \|g_i(x_{t,k}^i) - \nabla F_i(x_{t,k}^i)\|^2 + \eta_L^2 \mathbb{E} \left\| \frac{1}{m} \sum_{i=1}^m \sum_{k=0}^{K-1} \nabla F_i(x_{t,k}^i) \right\|^2 \\
&\leq \frac{\eta_L^2}{n} V\left(\frac{1}{mp_i^t} \hat{g}_i^t\right) + \eta_L^2 \frac{K}{m} \sigma_L^2 + \eta_L^2 \mathbb{E} \left\| \frac{1}{m} \sum_{i=1}^m \sum_{k=0}^{K-1} \nabla F_i(x_{t,k}^i) \right\|^2. \tag{33}
\end{aligned}$$



710 The third equality follows from independent sampling.

711 Specifically, for sampling with replacement, due to every index being independent, we utilize  
 712  $\mathbb{E}\|x_1^2 + \dots + x_n\|^2 = \mathbb{E}[\|x_1\|^2 + \dots + \|x_n\|^2]$ .

713 For sampling without replacement:

$$\begin{aligned}
 & \mathbb{E}\left\|\frac{1}{n} \sum_{i \in S_t} \left(\frac{1}{mp_i^t} \hat{g}_i^t - \frac{1}{m} \sum_{i=1}^m \hat{g}_i^t\right)\right\|^2 \\
 &= \frac{1}{n^2} \mathbb{E}\left\|\sum_{i=1}^m \mathbb{I}_i \left(\frac{1}{mp_i^t} \hat{g}_i^t - \frac{1}{m} \sum_{i=1}^m \hat{g}_i^t\right)\right\|^2 \\
 &= \frac{1}{n^2} \mathbb{E}\left(\left\|\sum_{i=1}^m \mathbb{I}_i \left(\frac{1}{mp_i^t} \hat{g}_i^t - \frac{1}{m} \sum_{i=1}^m \hat{g}_i^t\right)\right\|^2 \mid \mathbb{I}_i = 1\right) \times \mathbb{P}(\mathbb{I}_i = 1) \\
 &+ \frac{1}{n^2} \mathbb{E}\left(\left\|\sum_{i=1}^m \mathbb{I}_i \left(\frac{1}{mp_i^t} \hat{g}_i^t - \frac{1}{m} \sum_{i=1}^m \hat{g}_i^t\right)\right\|^2 \mid \mathbb{I}_i = 0\right) \times \mathbb{P}(\mathbb{I}_i = 0) \\
 &= \frac{1}{n} \sum_{i=1}^m p_i^t \left\|\frac{1}{mp_i^t} \hat{g}_i^t - \frac{1}{m} \sum_{i=1}^m \hat{g}_i^t\right\|^2 \\
 &= \frac{1}{n} E \left\|\frac{1}{mp_i^t} \hat{g}_i^t - \frac{1}{m} \sum_{i=1}^m \hat{g}_i^t\right\|^2. \tag{34}
 \end{aligned}$$

714 From the above, we observe that it is possible to achieve a speedup by sampling from the distribution  
 715 that minimizes  $V(\frac{1}{mp_i^t} \hat{g}_i^t)$ . Furthermore, as we discussed earlier, the optimal sampling probability  
 716 is  $p_i^* = \frac{|\hat{g}_i^t|}{\sum_{i=1}^m |\hat{g}_i^t|}$ . For MD sampling [31], which samples according to the data ratio, the optimal

717 sampling probability is  $p^* i, t = \frac{q_i |\hat{g}_i^t|}{\sum_{i=1}^m q_i |\hat{g}_i^t|}$ , where  $q_i = \frac{n_i}{N}$ .

718 Now we substitute the expressions of  $A_1$  and  $A_2$ :

$$\begin{aligned}
 & \mathbb{E}_t[f(x_{t+1})] \leq f(x_t) - \eta \eta_L K \|\nabla f(x_t)\|^2 + \eta \langle \nabla f(x_t), \mathbb{E}_t[\Delta_t + \eta_L K \nabla f(x_t)] \rangle + \frac{L}{2} \eta^2 \mathbb{E}_t \|\Delta_t\|^2 \\
 & \leq f(x_t) - \eta \eta_L K \left(\frac{1}{2} - 10L^2 K^2 \eta_L^2 (A^2 + 1)\right) \|\nabla f(x_t)\|^2 + \frac{5\eta \eta_L^3 L^2 K^2}{2} (\sigma_L^2 + 4K\sigma_G^2) \\
 & + \frac{\eta^2 \eta_L^2 KL}{2m} \sigma_L^2 + \frac{L\eta^2 \eta_L^2}{2n} V\left(\frac{1}{mp_i^t} \hat{g}_i^t\right) - \left(\frac{\eta \eta_L}{2K} - \frac{L\eta^2 \eta_L^2}{2}\right) \mathbb{E}_t \left\|\frac{1}{m} \sum_{i=1}^m \sum_{k=0}^{K-1} \nabla F_i(x_{t,k}^i)\right\|^2 \\
 & \leq f(x_t) - c\eta \eta_L K \|\nabla f(x_t)\|^2 + \frac{5\eta \eta_L^3 L^2 K^2}{2} (\sigma_L^2 + 4K\sigma_G^2) + \frac{\eta^2 \eta_L^2 KL}{2m} \sigma_L^2 + \frac{L\eta^2 \eta_L^2}{2n} V\left(\frac{1}{mp_i^t} \hat{g}_i^t\right), \tag{35}
 \end{aligned}$$

719 where the last inequality follows from  $\left(\frac{\eta \eta_L}{2K} - \frac{L\eta^2 \eta_L^2}{2}\right) \geq 0$  if  $\eta \eta_L \leq \frac{1}{KL}$ , and (a9) holds because  
 720 there exists a constant  $c > 0$  (for some  $\eta_L$ ) satisfying  $\frac{1}{2} - 10L^2 \frac{1}{m} \sum_{i=1}^m K^2 \eta_L^2 (A^2 + 1) > c > 0$ .

721 Rearranging and summing from  $t = 0, \dots, T-1$ , we have:

$$\sum_{t=1}^{T-1} c\eta \eta_L K \mathbb{E} \|\nabla f(x_t)\|^2 \leq f(x_0) - f(x_T) + T(\eta \eta_L K) \Phi. \tag{36}$$

722 Which implies:

$$\min_{t \in [T]} \mathbb{E} \|\nabla f(x_t)\|^2 \leq \frac{f_0 - f_*}{c\eta \eta_L K T} + \Phi, \tag{37}$$

723 where

$$\Phi = \frac{1}{c} \left[ \frac{5\eta_L^2 K L^2}{2} (\sigma_L^2 + 4K\sigma_G^2) + \frac{\eta_L L}{2m} \sigma_L^2 + \frac{L\eta_L}{2nK} V\left(\frac{1}{mp_i^t} \hat{g}_i^t\right) \right]. \quad (38)$$

724

□

### 725 D.1 Proof for convergence rate of FedIS (Theorem 3.1) under Assumption 1–3.

726 In this section, we compare the convergence rate of FedIS with and without Assumption 4. For  
727 comparison, we first provide the convergence result under Assumption 4.

728 First we show Assumption 4 can be used to bound the update variance  $V\left(\frac{1}{mp_i^t} \hat{g}_i^t\right)$ , and under the  
729 sampling probability FedIS (73):

$$V\left(\frac{1}{mp_i^t} \hat{g}_i^t\right) \leq \frac{1}{m^2} \mathbb{E} \left\| \sum_{i=1}^m \sum_{k=1}^K \nabla F_i(x_{t,k}, \xi_{k,t}) \right\|^2 \leq \frac{1}{m} \sum_{i=1}^m K \sum_{k=1}^K \mathbb{E} \left\| \nabla F_i(x_{t,k}, \xi_{k,t}) \right\|^2 \leq K^2 G^2 \quad (39)$$

730 While for using Assumption 3 instead of additional Assumption 4, we can also bound the update  
731 variance:

$$\begin{aligned} V\left(\frac{1}{mp_i^t} \hat{g}_i^t\right) &\leq \frac{1}{m^2} \mathbb{E} \left\| \sum_{i=1}^m \sum_{k=1}^K \nabla F_i(x_{t,k}, \xi_{k,t}) \right\|^2 \leq \frac{1}{m} \sum_{i=1}^m K \sum_{k=1}^K \mathbb{E} \left\| \nabla F_i(x_{t,k}, \xi_{k,t}) \right\|^2 \\ &\leq K^2 \sigma_G^2 + K^2 (A^2 + 1) \left\| \nabla f(x_t) \right\|^2 \end{aligned} \quad (40)$$

732 We replace the variance back to equation (35):

$$\begin{aligned} \mathbb{E}_t[f(x_{t+1})] &\leq f(x_t) - \eta_L K \left\| \nabla f(x_t) \right\|^2 + \eta \langle \nabla f(x_t), \mathbb{E}_t[\Delta_t + \eta_L K \nabla f(x_t)] \rangle + \frac{L}{2} \eta^2 \mathbb{E}_t \left\| \Delta_t \right\|^2 \\ &\leq f(x_t) - \eta_L K \left( \frac{1}{2} - 10L^2 K^2 \eta_L^2 (A^2 + 1) \right) \left\| \nabla f(x_t) \right\|^2 + \frac{5\eta \eta_L^3 L^2 K^2}{2} (\sigma_L^2 + 4K\sigma_G^2) \\ &\quad + \frac{\eta^2 \eta_L^2 K L}{2m} \sigma_L^2 + \frac{L\eta^2 \eta_L^2}{2n} V\left(\frac{1}{mp_i^t} \hat{g}_i^t\right) - \left( \frac{\eta \eta_L}{2K} - \frac{L\eta^2 \eta_L^2}{2} \right) \mathbb{E}_t \left\| \frac{1}{m} \sum_{i=1}^m \sum_{k=0}^{K-1} \nabla F_i(x_{t,k}^i) \right\|^2 \\ &\leq f(x_t) - \eta_L K \left( \frac{1}{2} - 10L^2 K^2 \eta_L^2 (A^2 + 1) - \frac{L\eta \eta_L K (A^2 + 1)}{2n} \right) \left\| \nabla f(x_t) \right\|^2 \\ &\quad + \frac{5\eta \eta_L^3 L^2 K^2}{2} (\sigma_L^2 + 4K\sigma_G^2) + \frac{\eta^2 \eta_L^2 K L}{2m} \sigma_L^2 + \frac{L\eta^2 \eta_L^2}{2n} K^2 \sigma_G^2 \\ &\quad - \left( \frac{\eta \eta_L}{2K} - \frac{L\eta^2 \eta_L^2}{2} \right) \mathbb{E}_t \left\| \frac{1}{m} \sum_{i=1}^m \sum_{k=0}^{K-1} \nabla F_i(x_{t,k}^i) \right\|^2. \end{aligned} \quad (41)$$

733 This shows that the requirement for  $\eta_L$  is different. It needs that there exists a constant  $c > 0$  (for  
734 some  $\eta_L$ ) satisfying  $\frac{1}{2} - 10L^2 K^2 \eta_L^2 (A^2 + 1) - \frac{L\eta \eta_L K (A^2 + 1)}{2n} > c > 0$ . One can still guarantee  
735 that there exists a constant for  $\eta_L$  to satisfy this inequality according to the properties of quadratic  
736 functions. Specifically, for the quadratic equation  $-10L^2 K^2 (A^2 + 1) \eta_L^2 - \frac{L\eta K (A^2 + 1)}{2n} \eta_L + \frac{1}{2}$ , we  
737 know that  $-10L^2 K^2 (A^2 + 1) < 0$ ,  $-\frac{L\eta K (A^2 + 1)}{2n}$  and  $\frac{1}{2} > 0$ . Based on the solution of quadratic  
738 equations, we can ensure that there exists a  $\eta_L > 0$  solution.

739 Then we can substitute equation (35) with equation (41) and let  $\eta_L = \mathcal{O}\left(\frac{1}{\sqrt{TKL}}\right)$  and  $\eta =$   
740  $\mathcal{O}\left(\sqrt{Kn}\right)$ , yielding the convergence rate of FedIS under Assumptions 1–3:

$$\min_{t \in [T]} \mathbb{E} \left\| \nabla f(x_t) \right\|^2 \leq \mathcal{O}\left(\frac{f^0 - f^*}{\sqrt{nKT}}\right) + \underbrace{\mathcal{O}\left(\frac{\sigma_L^2}{\sqrt{nKT}}\right) + \mathcal{O}\left(\frac{M^2}{T}\right) + \mathcal{O}\left(\frac{K\sigma_G^2}{\sqrt{nKT}}\right)}_{\text{order of } \Phi}. \quad (42)$$

## E Convergence of DELTA. Proof of Theorem 3.4

### E.1 Convergence rate with improved analysis method for getting DELTA

As we see FedIS can only reduce the update variance term in  $\Phi$ . Since we want to reduce the convergence variance as much as possible, the other term  $\sigma_L$  and  $\sigma_G$  still needs to be optimized. However, it is not straightforward to derive the optimization problem from  $\Phi$ . In order to further reduce the variance in  $\Phi$  (cf. 4), i.e., local variance ( $\sigma_L$ ) and global variance ( $\sigma_G$ ), we divide the convergence of the global objective into a surrogate objective and an update gap and analyze them separately. The analysis framework is shown in Figure 8.

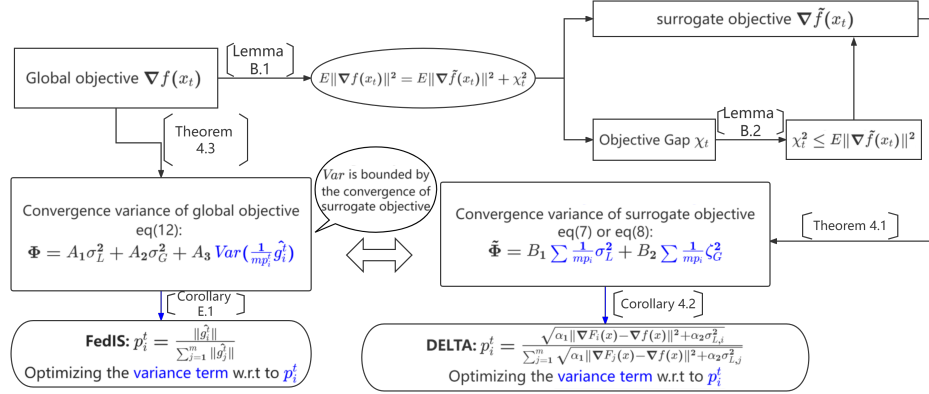

Figure 8: **Theoretical analysis flow.** The figure shows the theoretical analysis flow of FedIS (left) and DELTA (right), highlighting the differences in sampling probability due to variance.

As for the update gap, inspired by the expression form of the update variance, we formally define it as follows:

**Definition E.1** (Update gap). *In order to measure the update inconsistency, we define the update gap:*

$$\chi_t = \mathbb{E} \left[ \left\| \nabla \tilde{f}(x_t) - \nabla f(x_t) \right\| \right]. \quad (43)$$

Here, the expectation is taken over the distribution of all clients. When all clients participate, we have  $\chi_t^2 = 0$ . The update inconsistency exists as long as only a partial set of clients participate.

The update gap is a direct manifestation of the objective inconsistency in the update process. The presence of an update gap makes the analysis of the global objective different from the analysis of the surrogate objective. However, by ensuring the convergence of the update gap, we can re-derive the convergence result for the global objective. Formally, the update gap allows us to connect global objective convergence and surrogate objective convergence as follows:

$$\mathbb{E}\|\nabla f(x_t)\|^2 = \mathbb{E}\|\nabla \tilde{f}(x_t)\|^2 + \chi_t^2. \quad (44)$$

The equation follows from the property of unbiasedness, as shown in Lemma C.1.

To deduce the convergence rate of the global objective, we begin by examining the convergence analysis of the surrogate objective.

**Theorem E.2** (Convergence rate of surrogate objective). *Under Assumption 1–3 and let local and global learning rates  $\eta$  and  $\eta_L$  satisfy  $\eta_L < 1/(\sqrt{40KL} \sqrt{\frac{1}{n} \sum_{l=1}^m \frac{1}{m p_l^t}})$  and  $\eta\eta_L \leq 1/KL$ , the minimal gradient norm of surrogate objective will be bounded as below:*

$$\min_{t \in [T]} \mathbb{E} \left\| \nabla \tilde{f}(x_t) \right\|^2 \leq \frac{f^0 - f^*}{\bar{c} \eta \eta_L K T} + \frac{\tilde{\Phi}}{\bar{c}}, \quad (45)$$

where  $f^0 = f(x_0)$ ,  $f^* = f(x_*)$ , the expectation is over the local dataset samples among workers.

**$\tilde{\Phi}$  is the new combination of variance**, representing combinations of local variance and client gradient diversity.

For sampling without replacement:

$$\tilde{\Phi} = \frac{5L^2 K \eta_L^2}{2mn} \sum_{i=1}^m \frac{1}{p_i^t} (\sigma_{L,i}^2 + 4K \zeta_{G,i}^2) + \frac{L \eta_L \eta}{2n} \sum_{i=1}^m \frac{1}{m^2 p_i^t} \sigma_{L,i}^2, \quad (46)$$

769 For sampling with replacement:

$$\tilde{\Phi} = \frac{5L^2 K \eta_L^2}{2m^2} \sum_{i=1}^m \frac{1}{p_i^t} (\sigma_{L,i}^2 + 4K \zeta_{G,i}^2) + \frac{L \eta_L \eta}{2n} \sum_{i=1}^m \frac{1}{m^2 p_i^t} \sigma_{L,i}^2 \quad (47)$$

770 where  $\zeta_{G,i}$  represents client gradient diversity:  $\zeta_{G,i} = \|\nabla F_i(x_t) - \nabla f(x_t)\|^2$ <sup>3</sup>, and  $\tilde{c}$  is a constant.  
 771 The proof of Theorem E.2 is provided in Appendix E.2.1 and Appendix E.2.2. Specifically, the proof  
 772 for sampling with replacement is shown in Appendix E.2.1, while the proof for sampling without  
 773 replacement is shown in Appendix E.2.2.

774 **Remark E.3.** We observe that there is no update variance in  $\tilde{\Phi}$ , but the local variance and global  
 775 variance are still present. Additionally, the new combination of variance  $\tilde{\Phi}$  can be minimized by  
 776 optimizing the sampling probability, as will be shown later.

777 **Derive the convergence from surrogate objective to global objective.** As shown in Lemma C.1,  
 778 unbiased sampling guarantees that the expected partial client updates are equal to the participation  
 779 of all clients. With sufficient training rounds, unbiased sampling can ensure that the update gap  $\chi^2$   
 780 will converge to zero. However, we still need to know the convergence speed of  $\chi_t^2$  to recover the  
 781 convergence rate of the global objective. Fortunately, we can bound the convergence behavior of  $\chi_t^2$   
 782 by the convergence rate of the surrogate objective according to Definition E.1 and Lemma C.2. This  
 783 means that the update gap can achieve at least the same convergence rate as the surrogate objective.

784 **Corollary E.4** (New convergence rate of global objective). *Under Assumption 1–3 and based on the*  
 785 *above analysis that update variance is bounded, the global objective will converge to a stationary*  
 786 *point. Its gradient is bounded as:*

$$\min_{t \in [T]} \mathbb{E} \|\nabla f(x_t)\|^2 = \min_{t \in [T]} \mathbb{E} \|\nabla \tilde{f}(x_t)\|^2 + \mathbb{E} \|\chi_t^2\| \leq \min_{t \in [T]} 2\mathbb{E} \|\nabla \tilde{f}(x_t)\|^2 \leq \frac{f^0 - f^*}{c \eta \eta_L K T} + \frac{\tilde{\Phi}}{c}. \quad (48)$$

787 **Theorem E.5** (Restate of Theorem 3.4). *Under Assumptions 1-3 and the same conditions as in*  
 788 *Theorem 3.1, the minimal gradient norm of the surrogate objective will be bounded as follows*  
 789 *by setting  $\eta_L = \frac{1}{\sqrt{TKL}}$  and  $\eta \sqrt{Kn}$ . Let the local and global learning rates  $\eta$  and  $\eta_L$  satisfy*  
 790  *$\eta_L < \frac{1}{\sqrt{40KL} \sqrt{\frac{1}{n} \sum_{l=1}^m \frac{1}{m p_l^t}}}$  and  $\eta \eta_L \leq \frac{1}{KL}$ . Under Assumptions 1-3 and with partial worker*  
 791 *participation, the sequence of outputs  $x_k$  generated by Algorithm 1 satisfies:*

$$\min_{t \in [T]} \mathbb{E} \|\nabla f(x_t)\|^2 \leq \frac{F}{c \eta \eta_L K T} + \frac{1}{c} \tilde{\Phi}, \quad (49)$$

792 where  $F = f(x_0) - f(x_*)$ , and the expectation is over the local dataset samplings among workers.  
 793  $c$  is a constant.  $\zeta_{G,i}$  is defined as client gradient diversity:  $\zeta_{G,i} = \|\nabla F_i(x_t) - \nabla f(x_t)\|^2$ .

794 For sample with replacement:  $\tilde{\Phi} = \frac{5L^2 K \eta_L^2}{2m^2} \sum_{l=1}^m \frac{1}{p_l^t} (\sigma_{L,l}^2 + 4K \zeta_{G,l}^2) + \frac{L \eta_L \eta}{2n} \sum_{l=1}^m \frac{1}{m^2 p_l^t} \sigma_{L,l}^2$ .

795 For sampling without replacement:  $\tilde{\Phi} = \frac{5L^2 K \eta_L^2}{2mn} \sum_{l=1}^m \frac{1}{p_l^t} (\sigma_{L,l}^2 + 4K \zeta_{G,l}^2) + \frac{L \eta_L \eta}{2n} \sum_{l=1}^m \frac{1}{m^2 p_l^t} \sigma_{L,l}^2$ .

796 **Remark E.6** (Condition of  $\eta_L$ ). Here, though the condition expression for  $\eta_L$  relies on a dynamic  
 797 sampling probability  $p_i^t$ , we can still guarantee that there a constant  $\eta_L$  satisfies this condition.

798 Specifically, one can substitute the optimal sampling probability  $\frac{1}{p_i^t} = \frac{\sum_{j=1}^m \sqrt{\alpha_1 \zeta_{G,j}^2 + \alpha_2 \sigma_{L,j}^2}}{\sqrt{\alpha_1 \zeta_{G,i}^2 + \alpha_2 \sigma_{L,i}^2}}$   
 799 back to the above inequality condition. As long as the gradient  $\nabla F_i(x_t)$  is bounded,  
 800 we can ensure  $\frac{1}{m^2} \sum_{i=1}^m \frac{\sum_{j=1}^m \sqrt{\alpha_1 \zeta_{G,j}^2 + \alpha_2 \sigma_{L,j}^2}}{\sqrt{\alpha_1 \zeta_{G,i}^2 + \alpha_2 \sigma_{L,i}^2}} \leq \frac{\max_j \sqrt{\alpha_1 \zeta_{G,j}^2 + \alpha_2 \sigma_{L,j}^2}}{\min_i \sqrt{\alpha_1 \zeta_{G,i}^2 + \alpha_2 \sigma_{L,i}^2}} \leq \tilde{G}$ , therefore  
 801  $\frac{1}{2\sqrt{10(A^2+1)}KL} \sqrt{\frac{1}{m^2} \sum_{i=1}^m \frac{\sum_{j=1}^m \sqrt{\alpha_1 \zeta_{G,j}^2 + \alpha_2 \sigma_{L,j}^2}}{\sqrt{\alpha_1 \zeta_{G,i}^2 + \alpha_2 \sigma_{L,i}^2}}} \geq \frac{1}{2\sqrt{10(A^2+1)}KL\sqrt{\tilde{G}}} \geq C$ , where  $\tilde{G}$  and  $C$  are  
 802 positive constants. Thus, we can always find a constant  $\eta_L$  to satisfy this inequality under dynamic  
 803 sampling probability  $p_i^t$ .

<sup>3</sup>In the Appendix, we abbreviate  $\zeta_{G,i,t}$  to  $\zeta_{G,i}$  for the sake of simplicity in notation, without any loss of generality.

804 **Corollary E.7** (Convergence rate of DELTA). Suppose  $\eta_L$  and  $\eta$  are such that the conditions  
805 mentioned above are satisfied,  $\eta_L = \mathcal{O}\left(\frac{1}{\sqrt{TKL}}\right)$  and  $\eta = \mathcal{O}\left(\sqrt{Kn}\right)$ . Then for sufficiently large  $T$ ,  
806 the iterates of Theorem 3.4 satisfy:

$$\min_{t \in [T]} \mathbb{E} \|\nabla f(x_t)\|^2 \leq \mathcal{O}\left(\frac{F}{\sqrt{nKT}}\right) + \mathcal{O}\left(\frac{\sigma_L^2}{\sqrt{nKT}}\right) + \mathcal{O}\left(\frac{\sigma_L^2 + 4K\zeta_G^2}{KT}\right). \quad (50)$$

807 **Lemma E.8.** For any step-size satisfying  $\eta_L \leq \frac{1}{8LK}$ , we can have the following results:

$$\mathbb{E} \|x_{t,k}^i - x_t\|^2 \leq 5K(\eta_L^2 \sigma_L^2 + 4K\eta_L^2 \zeta_{G,i}^2) + 20K^2(A^2 + 1)\eta_L^2 \|\nabla f(x_t)\|^2. \quad (51)$$

808 where  $\zeta_{G,i} = \|\nabla F_i(x_t) - \nabla f(x_t)\|$ , and the expectation is over local SGD and filtration of  $x_t$ ,  
809 without the stochasticity of client sampling.

*Proof.*

$$\begin{aligned} & \mathbb{E}_t \|x_{t,k}^i - x_t\|^2 \\ &= \mathbb{E}_t \|x_{t,k-1}^i - x_t - \eta_L g_{t,k-1}^t\|^2 \\ &= \mathbb{E}_t \|x_{t,k-1}^i - x_t - \eta_L (g_{t,k-1}^t - \nabla F_i(x_{t,k-1}^i) + \nabla F_i(x_{t,k-1}^i) - \nabla F_i(x_t) + \nabla F_i(x_t))\|^2 \\ &\leq (1 + \frac{1}{2K-1}) \mathbb{E}_t \|x_{t,k-1}^i - x_t\|^2 + \mathbb{E}_t \|\eta_L (g_{t,k-1}^t - \nabla F_i(x_{t,k-1}^i))\|^2 \\ &\quad + 4K \mathbb{E}_t [\|\eta_L (\nabla F_i(x_{t,k-1}^i) - \nabla F_i(x_t))\|^2] + 4K\eta_L^2 \mathbb{E}_t \|\nabla F_i(x_t)\|^2 \\ &\leq (1 + \frac{1}{2K-1}) \mathbb{E}_t \|x_{t,k-1}^i - x_t\|^2 + \eta_L^2 \sigma_L^2 + 4K\eta_L^2 L^2 \mathbb{E}_t \|x_{t,k-1}^i - x_t\|^2 \\ &\quad + 4K\eta_L^2 \zeta_{G,i}^2 + 4K\eta_L^2 (A^2 + 1) \|\nabla f(x_t)\|^2 \\ &\leq (1 + \frac{1}{K-1}) \mathbb{E}_t \|x_{t,k-1}^i - x_t\|^2 + \eta_L^2 \sigma_L^2 + 4K\eta_L^2 \zeta_{G,i}^2 + 4K(A^2 + 1) \|\eta_L \nabla f(x_t)\|^2. \end{aligned} \quad (52)$$

810 Unrolling the recursion, we get:

$$\begin{aligned} \mathbb{E}_t \|x_{t,k}^i - x_t\|^2 &\leq \sum_{p=0}^{k-1} (1 + \frac{1}{K-1})^p [\eta_L^2 \sigma_L^2 + 4K\eta_L^2 \zeta_{G,i}^2 + 4K(A^2 + 1) \|\eta_L \nabla f(x_t)\|^2] \\ &\leq (K-1) \left[ (1 + \frac{1}{K-1})^K - 1 \right] [\eta_L^2 \sigma_L^2 + 4K\eta_L^2 \zeta_{G,i}^2 + 4K(A^2 + 1) \|\eta_L \nabla f(x_t)\|^2] \\ &\leq 5K(\eta_L^2 \sigma_L^2 + 4K\eta_L^2 \zeta_{G,i}^2) + 20K^2(A^2 + 1)\eta_L^2 \|\nabla f(x_t)\|^2. \end{aligned} \quad (53)$$

811

□

## 812 E.2 Proof for Theorem E.2.

813 In Section E.2.1 and Section E.2.2, we provide the proof for Theorem E.2. Specifically, the proof  
814 for sampling with replacement is shown in Appendix E.2.1, while the proof for sampling without  
815 replacement is shown in Appendix E.2.2.

### 816 E.2.1 Sample with replacement

$$\min_{t \in [T]} \mathbb{E} \|\nabla \tilde{f}(x_t)\|^2 \leq \frac{f_0 - f_*}{c\eta\eta_L KT} + \frac{1}{c} \tilde{\Phi}, \quad (54)$$

817 where  $\tilde{\Phi} = \frac{5L^2 K \eta_L^2}{2m^2} \sum_{l=1}^m \frac{1}{p_l^2} (\sigma_L^2 + 4K\zeta_{G,i}^2) + \frac{L\eta_L \eta}{2n} \sum_{l=1}^m \frac{1}{m^2 p_l^2} \sigma_L^2$ .

*Proof.*

$$\begin{aligned}
\mathbb{E}_t[\tilde{f}(x_{t+1})] &\stackrel{(a1)}{\leq} \tilde{f}(x_t) + \left\langle \nabla \tilde{f}(x_t), \mathbb{E}_t[x_{t+1} - x_t] \right\rangle + \frac{L}{2} \mathbb{E}_t[\|x_{t+1} - x_t\|^2] \\
&= \tilde{f}(x_t) + \left\langle \nabla \tilde{f}(x_t), \mathbb{E}_t[\eta \Delta_t + \eta \eta_L K \nabla \tilde{f}(x_t) - \eta \eta_L K \nabla \tilde{f}(x_t)] \right\rangle + \frac{L}{2} \eta^2 \mathbb{E}_t[\|\Delta_t\|^2] \\
&= \tilde{f}(x_t) - \eta \eta_L K \left\| \nabla \tilde{f}(x_t) \right\|^2 + \underbrace{\eta \left\langle \nabla \tilde{f}(x_t), \mathbb{E}_t[\Delta_t + \eta_L K \nabla \tilde{f}(x_t)] \right\rangle}_{A_1} + \underbrace{\frac{L}{2} \eta^2 \mathbb{E}_t[\|\Delta_t\|^2]}_{A_2}.
\end{aligned} \tag{55}$$

Where (a1) follows from the Lipschitz continuity condition. Here, the expectation is over the local data SGD and the filtration of  $x_t$ . However, in the next analysis, the expectation is over all randomness, including client sampling. This is achieved by taking expectation on both sides of the above equation over client sampling.

To begin, let us consider  $A_1$ :

$$\begin{aligned}
A_1 &= \left\langle \nabla \tilde{f}(x_t), \mathbb{E}_t[\Delta_t + \eta_L K \nabla \tilde{f}(x_t)] \right\rangle \\
&= \left\langle \nabla \tilde{f}(x_t), \mathbb{E}_t \left[ -\frac{1}{|S_t|} \sum_{i \in S_t} \frac{1}{mp_i^t} \sum_{k=0}^{K-1} \eta_L g_{t,k}^i + \eta_L K \nabla \tilde{f}(x_t) \right] \right\rangle \\
&\stackrel{(a2)}{=} \left\langle \nabla \tilde{f}(x_t), \mathbb{E}_t \left[ -\frac{1}{|S_t|} \sum_{i \in S_t} \frac{1}{mp_i^t} \sum_{k=0}^{K-1} \eta_L \nabla F_i(x_{t,k}^i) + \eta_L K \nabla \tilde{f}(x_t) \right] \right\rangle \\
&= \left\langle \sqrt{K \eta_L} \nabla \tilde{f}(x_t), \frac{\sqrt{\eta_L}}{\sqrt{K}} \mathbb{E}_t \left[ -\frac{1}{n} \sum_{i \in S_t} \frac{1}{mp_i^t} \sum_{k=0}^{K-1} \nabla F_i(x_{t,k}^i) + K \nabla \tilde{f}(x_t) \right] \right\rangle \\
&\stackrel{(a3)}{=} \frac{K \eta_L}{2} \|\nabla \tilde{f}(x_t)\|^2 + \frac{\eta_L}{2K} \mathbb{E}_t \left( \left\| -\frac{1}{n} \sum_{i \in S_t} \frac{1}{mp_i^t} \sum_{k=0}^{K-1} \nabla F_i(x_{t,k}^i) + K \nabla \tilde{f}(x_t) \right\|^2 \right) \\
&\quad - \frac{\eta_L}{2K} \mathbb{E}_t \left\| -\frac{1}{n} \sum_{i \in S_t} \frac{1}{mp_i^t} \sum_{k=0}^{K-1} \nabla F_i(x_{t,k}^i) \right\|^2,
\end{aligned} \tag{56}$$

where (a2) follows from Assumption 2, and (a3) is due to  $\langle x, y \rangle = \frac{1}{2} [\|x\|^2 + \|y\|^2 - \|x - y\|^2]$  for  $x = \sqrt{K \eta_L} \nabla \tilde{f}(x_t)$  and  $y = \frac{\sqrt{\eta_L}}{K} [-\frac{1}{n} \sum_{i \in S_t} \frac{1}{mp_i^t} \sum_{k=0}^{K-1} \nabla F_i(x_{t,k}^i) + K \nabla \tilde{f}(x_t)]$ .

826 To bound  $A_1$ , we need to bound the following part:

$$\begin{aligned}
& \mathbb{E}_t \left\| \frac{1}{n} \sum_{i \in S_t} \frac{1}{mp_i^t} \sum_{k=0}^{K-1} \nabla F_i(x_{t,k}^i) - K \nabla \tilde{f}(x_t) \right\|^2 \\
&= \mathbb{E}_t \left\| \frac{1}{n} \sum_{i \in S_t} \frac{1}{mp_i^t} \sum_{k=0}^{K-1} \nabla F_i(x_{t,k}^i) - \frac{1}{n} \sum_{i \in S_t} \frac{1}{mp_i^t} \sum_{k=0}^{K-1} \nabla F_i(x_t) \right\|^2 \\
&\stackrel{(a4)}{\leq} \frac{K}{n} \sum_{i \in S_t} \sum_{k=0}^{K-1} \mathbb{E}_t \left\| \frac{1}{mp_i^t} (\nabla F_i(x_{t,k}^i) - \nabla F_i(x_t)) \right\|^2 \\
&= \frac{K}{n} \sum_{i \in S_t} \sum_{k=0}^{K-1} \mathbb{E}_t \left\{ \mathbb{E}_t \left( \left\| \frac{1}{mp_i^t} (\nabla F_i(x_{t,k}^i) - \nabla F_i(x_t)) \right\|^2 \mid S \right) \right\} \\
&= \frac{K}{n} \sum_{i \in S_t} \sum_{k=0}^{K-1} \mathbb{E}_t \left( \sum_{l=1}^m \frac{1}{m^2 p_l^t} \left\| \nabla F_l(x_{t,k}^l) - \nabla F_l(x_t) \right\|^2 \right) \\
&= K \sum_{k=0}^{K-1} \sum_{l=1}^m \frac{1}{m^2 p_l^t} \mathbb{E}_t \left\| \nabla F_l(x_{t,k}^l) - \nabla F_l(x_t) \right\|^2 \\
&\stackrel{(a5)}{\leq} \frac{K^2}{m^2} \sum_{l=1}^m \frac{L^2}{p_l^t} \mathbb{E} \|x_{t,k}^l - x_t\|^2 \\
&\stackrel{(a6)}{\leq} \frac{L^2 K^2}{m^2} \sum_{l=1}^m \frac{1}{p_l^t} (5K(\eta_L^2 \sigma_L^2 + 4K\eta_L^2 \zeta_{G,i}^2) + 20K^2(A^2 + 1)\eta_L^2 \|\nabla f(x_t)\|^2) \\
&= \frac{5L^2 K^3 \eta_L^2}{m^2} \sum_{l=1}^m \frac{1}{p_l^t} (\sigma_L^2 + 4K\sigma_G^2) + \frac{20L^2 K^4 \eta_L^2 (A^2 + 1)}{m^2} \sum_{l=1}^m \frac{1}{p_l^t} \|\nabla f(x_t)\|^2, \quad (57)
\end{aligned}$$

827 where (a4) follows from the fact that  $\mathbb{E}|x_1 + \dots + x_n|^2 \leq n\mathbb{E}(|x_1|^2 + \dots + |x_n|^2)$ , (a5) is a  
828 consequence of Assumption 1, and (a6) is a result of Lemma E.8.

829 Combining the above expressions, we obtain:

$$\begin{aligned}
A_1 &\leq \frac{K\eta_L}{2} \|\nabla \tilde{f}(x_t)\|^2 + \frac{\eta_L}{2K} \left[ \frac{5L^2 K^3 \eta_L^2}{m^2} \sum_{l=1}^m \frac{1}{p_l^t} (\sigma_L + 4K\zeta_{G,i}^2) \right. \\
&\quad \left. + \frac{20L^2 K^4 \eta_L^2 (A^2 + 1)}{m^2} \sum_{l=1}^m \frac{1}{p_l^t} \|\nabla f(x_t)\|^2 \right] - \frac{\eta_L}{2K} \mathbb{E}_t \left\| -\frac{1}{n} \sum_{i \in S_t} \frac{1}{mp_i^t} \sum_{k=0}^{K-1} \nabla F_i(x_{t,k}^i) \right\|^2. \quad (58)
\end{aligned}$$



830 Next, we consider bounding  $A_2$ :

$$\begin{aligned}
A_2 &= \mathbb{E}_t \|\Delta_t\|^2 \\
&= \mathbb{E}_t \left\| -\eta_L \frac{1}{n} \sum_{i \in S_t} \frac{1}{mp_i^t} \sum_{k=0}^{K-1} g_{t,k}^i \right\|^2 \\
&= \eta_L^2 \mathbb{E}_t \left\| \frac{1}{n} \sum_{i \in S_t} \sum_{k=0}^{K-1} \left( \frac{1}{mp_i^t} g_{t,k}^i - \frac{1}{mp_i^t} \nabla F_i(x_{t,k}^i) \right) \right\|^2 + \eta_L^2 \mathbb{E}_t \left\| -\frac{1}{n} \sum_{i \in S_t} \frac{1}{mp_i^t} \sum_{k=0}^{K-1} \nabla F_i(x_{t,k}^i) \right\|^2 \\
&= \eta_L^2 \frac{1}{n^2} \sum_{i \in S_t} \sum_{k=0}^{K-1} \mathbb{E}_t \left\| \frac{1}{mp_i^t} g_{t,k}^i - \frac{1}{mp_i^t} \nabla F_i(x_{t,k}^i) \right\|^2 + \eta_L^2 \mathbb{E}_t \left\| -\frac{1}{n} \sum_{i \in S_t} \frac{1}{mp_i^t} \sum_{k=0}^{K-1} \nabla F_i(x_{t,k}^i) \right\|^2 \\
&= \eta_L^2 \frac{1}{n^2} \sum_{k=0}^{K-1} \mathbb{E}_t \left( \mathbb{E} \left\| \frac{1}{mp_i^t} (g_{t,k}^i - \nabla F_i(x_{t,k}^i)) \right\|^2 \mid S \right) + \eta_L^2 \mathbb{E}_t \left\| -\frac{1}{n} \sum_{i \in S_t} \frac{1}{mp_i^t} \sum_{k=0}^{K-1} \nabla F_i(x_{t,k}^i) \right\|^2 \\
&= \eta_L^2 \frac{1}{n^2} \sum_{k=0}^{K-1} \mathbb{E}_t \left( \sum_{l=1}^m \frac{1}{m^2 p_l^t} \|g_{t,k}^i - \nabla F_i(x_{t,k}^i)\|^2 \right) + \eta_L^2 \mathbb{E}_t \left\| -\frac{1}{n} \sum_{i \in S_t} \frac{1}{mp_i^t} \sum_{k=0}^{K-1} \nabla F_i(x_{t,k}^i) \right\|^2 \\
&\stackrel{(a7)}{\leq} \eta_L^2 \frac{K}{n} \sum_{l=1}^m \frac{1}{m^2 p_l^t} \sigma_L^2 + \eta_L^2 \mathbb{E}_t \left\| -\frac{1}{n} \sum_{i \in S_t} \frac{1}{mp_i^t} \sum_{k=0}^{K-1} \nabla F_i(x_{t,k}^i) \right\|^2, \tag{59}
\end{aligned}$$

831 where  $S$  represents the whole sample space and (a7) is due to Assumption 2.

832 Now we substitute the expressions for  $A_1$  and  $A_2$  and take the expectation over the client sampling  
833 distribution on both sides. It should be noted that the derivation of  $A_1$  and  $A_2$  above is based on  
834 considering the expectation over the sampling distribution:

$$\begin{aligned}
f(x_{t+1}) &\leq f(x_t) - \eta \eta_L K \mathbb{E}_t \left\| \nabla \tilde{f}(x_t) \right\|^2 + \eta \mathbb{E}_t \left\langle \nabla \tilde{f}(x_t), \Delta_t + \eta_L K \nabla \tilde{f}(x_t) \right\rangle + \frac{L}{2} \eta^2 \mathbb{E}_t \|\Delta_t\|^2 \\
&\stackrel{(a8)}{\leq} f(x_t) - K \eta \eta_L \left( \frac{1}{2} - \frac{20K^2 \eta_L^2 L^2 (A^2 + 1)}{m^2} \sum_{l=1}^m \frac{1}{p_l^t} \right) \mathbb{E}_t \left\| \nabla \tilde{f}(x_t) \right\|^2 \\
&\quad + \frac{5L^2 K^2 \eta_L^3 \eta}{2m^2} \sum_{l=1}^m \frac{1}{p_l^t} (\sigma_L + 4K \zeta_{G,i}^2) \\
&\quad + \frac{L \eta_L^2 \eta^2 K}{2n} \sum_{l=1}^m \frac{1}{m^2 p_l^t} \sigma_L^2 - \left( \frac{\eta \eta_L}{2K} - \frac{L \eta^2 \eta_L^2}{2} \right) \mathbb{E}_t \left\| -\frac{1}{n} \sum_{i \in S_t} \frac{1}{mp_i^t} \sum_{k=0}^{K-1} \nabla f_i(x_{t,k}^i) \right\|^2 \\
&\stackrel{(a9)}{\leq} f(x_t) - K \eta \eta_L \left( \frac{1}{2} - \frac{20K^2 \eta_L^2 L^2 (A^2 + 1)}{m^2} \sum_{l=1}^m \frac{1}{p_l^t} \right) \mathbb{E}_t \left\| \nabla \tilde{f}(x_t) \right\|^2 \\
&\quad + \frac{5L^2 K^2 \eta_L^3 \eta}{2m^2} \sum_{l=1}^m \frac{1}{p_l^t} (\sigma_L + 4K \zeta_{G,i}^2) + \frac{L \eta_L^2 \eta^2 K}{2n} \sum_{l=1}^m \frac{1}{m^2 p_l^t} \sigma_L^2 \\
&\stackrel{(a10)}{\leq} f(x_t) - c K \eta \eta_L \mathbb{E}_t \left\| \nabla \tilde{f}(x_t) \right\|^2 + \frac{5L^2 K^2 \eta_L^3 \eta}{2m^2} \sum_{l=1}^m \frac{1}{p_l^t} (\sigma_L^2 + 4K \zeta_{G,i}^2) + \frac{L \eta_L^2 \eta^2 K}{2n} \sum_{l=1}^m \frac{1}{m^2 p_l^t} \sigma_L^2, \tag{60}
\end{aligned}$$

835 where (a8) comes from Lemma C.2, (a9) follows from  $\left( \frac{\eta \eta_L}{2K} - \frac{L \eta^2 \eta_L^2}{2} \right) \geq 0$  if  $\eta \eta_L \leq \frac{1}{KL}$ , and (a10)

836 holds because there exists a constant  $c > 0$  satisfying  $\left( \frac{1}{2} - \frac{20K^2 \eta_L^2 L^2 (A^2 + 1)}{m^2} \sum_{l=1}^m \frac{1}{p_l^t} \right) > c > 0$  if

$$837 \eta_L < \frac{1}{2\sqrt{10(A^2+1)KL} \sqrt{\frac{1}{m} \sum_{l=1}^m \frac{1}{mp_l^t}}}.$$

838

839 Rearranging and summing from  $t = 0, \dots, T - 1$ , we have:

$$\begin{aligned} \sum_{t=1}^{T-1} c\eta\eta_L K \mathbb{E} \|\nabla \tilde{f}(x_t)\|^2 &\leq f(x_0) - f(x_T) \\ &\quad + T(\eta\eta_L K) \left( \frac{5L^2 K \eta_L^2}{2m^2} \sum_{l=1}^m \frac{1}{p_l^t} (\sigma_L^2 + 4K\zeta_{G,i}^2) + \frac{L\eta_L\eta}{2n} \sum_{l=1}^m \frac{1}{m^2 p_l^t} \sigma_L^2 \right). \end{aligned} \quad (61)$$

840 Which implies:

$$\min_{t \in [T]} \mathbb{E} \|\nabla \tilde{f}(x_t)\|^2 \leq \frac{f_0 - f_*}{c\eta\eta_L K T} + \frac{1}{c} \tilde{\Phi}, \quad (62)$$

841 where  $\tilde{\Phi} = \frac{5L^2 K \eta_L^2}{2mn} \sum_{l=1}^m \frac{1}{p_l^t} (\sigma_L^2 + 4K\zeta_{G,i}^2) + \frac{L\eta_L\eta}{2n} \sum_{l=1}^m \frac{1}{m^2 p_l^t} \sigma_L^2$ .

842 □

## 843 E.2.2 Sample without replacement

$$\min_{t \in [T]} \mathbb{E} \|\nabla \tilde{f}(x_t)\|^2 \leq \frac{f_0 - f_*}{c\eta\eta_L K T} + \frac{1}{c} \tilde{\Phi}, \quad (63)$$

844 where  $\tilde{\Phi} = \frac{5L^2 K \eta_L^2}{2mn} \sum_{l=1}^m \frac{1}{p_l^t} (\sigma_L^2 + 4K\zeta_{G,i}^2) + \frac{L\eta_L\eta}{2n} \sum_{l=1}^m \frac{1}{m^2 p_l^t} \sigma_L^2$ .

*Proof.*

$$\begin{aligned} \mathbb{E}[\tilde{f}(x_{t+1})] &\leq \tilde{f}(x_t) + \left\langle \nabla \tilde{f}(x_t), \mathbb{E}[x_{t+1} - x_t] \right\rangle + \frac{L}{2} \mathbb{E}_t[\|x_{t+1} - x_t\|] \\ &= \tilde{f}(x_t) + \left\langle \nabla \tilde{f}(x_t), \mathbb{E}_t[\eta\Delta_t + \eta\eta_L K \nabla \tilde{f}(x_t) - \eta\eta_L K \nabla \tilde{f}(x_t)] \right\rangle + \frac{L}{2} \eta^2 \mathbb{E}_t[\|\Delta_t\|^2] \\ &= \tilde{f}(x_t) - \eta\eta_L K \left\| \nabla \tilde{f}(x_t) \right\|^2 + \underbrace{\eta \left\langle \nabla \tilde{f}(x_t), \mathbb{E}_t[\Delta_t + \eta_L K \nabla \tilde{f}(x_t)] \right\rangle}_{A_1} + \underbrace{\frac{L}{2} \eta^2 \mathbb{E}_t[\|\Delta_t\|^2]}_{A_2}. \end{aligned} \quad (64)$$

845 Where the first inequality follows from Lipschitz continuous condition. The expectation here is taken  
846 over both the local SGD and the filtration of  $x_t$ . However, in the subsequent analysis, the expectation  
847 is taken over all sources of randomness, including client sampling.

848 Similarly, we consider  $A_1$  first:

$$\begin{aligned} A_1 &= \left\langle \nabla \tilde{f}(x_t), \mathbb{E}_t[\Delta_t + \eta_L K \nabla \tilde{f}(x_t)] \right\rangle \\ &= \left\langle \nabla \tilde{f}(x_t), \mathbb{E}_t \left[ -\frac{1}{|S_t|} \sum_{i \in S_t} \frac{1}{mp_i^t} \sum_{k=0}^{K-1} \eta_L g_{t,k}^i + \eta_L K \nabla \tilde{f}(x_t) \right] \right\rangle \\ &= \left\langle \nabla \tilde{f}(x_t), \mathbb{E}_t \left[ -\frac{1}{|S_t|} \sum_{i \in S_t} \frac{1}{mp_i^t} \sum_{k=0}^{K-1} \eta_L \nabla F_i(x_{t,k}^i) + \eta_L K \nabla \tilde{f}(x_t) \right] \right\rangle \\ &= \left\langle \sqrt{K\eta_L} \nabla \tilde{f}(x_t), \frac{\sqrt{\eta_L}}{\sqrt{K}} \mathbb{E}_t \left[ -\frac{1}{n} \sum_{i \in S_t} \frac{1}{mp_i^t} \sum_{k=0}^{K-1} \nabla F_i(x_{t,k}^i) + K \nabla \tilde{f}(x_t) \right] \right\rangle \\ &= \frac{K\eta_L}{2} \left\| \nabla \tilde{f}(x_t) \right\|^2 + \frac{\eta_L}{2K} \mathbb{E}_t \left\| -\frac{1}{n} \sum_{i \in S_t} \frac{1}{mp_i^t} \sum_{k=0}^{K-1} \nabla F_i(x_{t,k}^i) + K \nabla \tilde{f}(x_t) \right\|^2 \\ &\quad - \frac{\eta_L}{2K} \mathbb{E}_t \left\| -\frac{1}{n} \sum_{i \in S_t} \frac{1}{mp_i^t} \sum_{k=0}^{K-1} \nabla F_i(x_{t,k}^i) \right\|^2. \end{aligned} \quad (65)$$

849 Since  $x_i$  are sampled from  $S_t$  without replacement, this causes pairs  $x_{i1}$  and  $x_{i2}$  to no longer be  
 850 independent. We introduce the activation function as follows:

$$\mathbb{I}_m \triangleq \begin{cases} 1 & \text{if } x \in S_t, \\ 0 & \text{otherwise.} \end{cases} \quad (66)$$

851 Then we obtain the following bound:

$$\begin{aligned} & \mathbb{E}_t \left\| \frac{1}{n} \sum_{i \in S_t} \frac{1}{mp_i^t} \sum_{k=0}^{K-1} \nabla F_i(x_{t,k}^i) - K \nabla \tilde{f}(x_t) \right\|^2 \\ &= \mathbb{E}_t \left\| \frac{1}{n} \sum_{l=1}^m \mathbb{I}_m \frac{1}{mp_l^t} \sum_{k=0}^{K-1} \nabla F_l(x_{t,k}^l) - \frac{1}{n} \sum_{l=1}^m \mathbb{I}_m \frac{1}{mp_l^t} \sum_{k=0}^{K-1} \nabla F_l(x_t) \right\|^2 \\ &\stackrel{(b1)}{\leq} \frac{m}{n^2} \sum_{l=1}^m \mathbb{E}_t \left\| \mathbb{I}_m \frac{1}{mp_l^t} \sum_{k=0}^{K-1} (\nabla F_l(x_{t,k}^l) - \nabla F_l(x_t)) \right\|^2 \\ &\quad - \frac{1}{n^2} \sum_{l_1 \neq l_2} \mathbb{E}_t \left\| \left\{ \mathbb{I}_m \frac{1}{mp_{l_1}^t} \sum_{k=0}^{K-1} (\nabla F_{l_1}(x_{t,k}^{l_1}) - \nabla F_{l_1}(x_t)) \right\} \right. \\ &\quad \left. - \left\{ \mathbb{I}_m \frac{1}{mp_{l_2}^t} \sum_{k=0}^{K-1} (\nabla F_{l_2}(x_{t,k}^{l_2}) - \nabla F_{l_2}(x_t)) \right\} \right\|^2 \\ &\leq \frac{m}{n^2} \sum_{l=1}^m \mathbb{E}_t \left\| \mathbb{I}_m \frac{1}{mp_l^t} \sum_{k=0}^{K-1} \left( \nabla F_l(x_{t,k}^l) - \frac{1}{mp_l^t} \nabla F_l(x_t) \right) \right\|^2 \\ &= \frac{m}{n^2} \sum_{l=1}^m \mathbb{E}_t \left\{ \left\| \mathbb{I}_m \frac{1}{mp_l^t} \sum_{k=0}^{K-1} \left( \nabla F_l(x_{t,k}^l) - \frac{1}{mp_l^t} \nabla F_l(x_t) \right) \right\|^2 \mid \mathbb{I}_m = 1 \right\} \times P(\mathbb{I}_m = 1) \\ &\quad + \mathbb{E}_t \left\{ \left\| \mathbb{I}_m \left( \frac{1}{mp_l^t} \sum_{k=0}^{K-1} \nabla F_l(x_{t,k}^l) - \frac{1}{mp_l^t} \nabla F_l(x_t) \right) \right\|^2 \mid \mathbb{I}_m = 0 \right\} \times P(\mathbb{I}_m = 0) \\ &= \frac{m}{n^2} \sum_{l=1}^m np_l^t \mathbb{E} \left\| \frac{1}{mp_l^t} \sum_{k=0}^{K-1} \nabla F_l(x_{t,k}^l) - \frac{1}{mp_l^t} \sum_{k=0}^{K-1} \nabla F_l(x_t) \right\|^2 \\ &\stackrel{(b2)}{\leq} \frac{L^2 K}{mn} \sum_{k=0}^{K-1} \sum_{l=1}^m \frac{1}{p_l^t} \mathbb{E} \|x_{t,k}^l - x_t\|^2 \\ &\stackrel{(b3)}{\leq} \frac{L^2 K^2}{n} \left( 5K \frac{\eta_L^2}{m} \sum_{l=1}^m \frac{1}{p_l^t} (\sigma_L^2 + 4K \zeta_{G,i}^2) + 20K^2 (A^2 + 1) \eta_L^2 \|\nabla f(x_t)\|^2 \frac{1}{m} \sum_{l=1}^m \frac{1}{p_l^t} \right), \quad (67) \end{aligned}$$

852 where (b1) follows from  $\|\sum_{i=1}^m t_i\|^2 = \sum_{i \in [m]} \|t_i\|^2 + \sum_{i \neq j} \langle t_i, t_j \rangle \stackrel{c1}{=} \sum_{i \in [m]} m \|t_i\|^2 -$   
 853  $\frac{1}{2} \sum_{i \neq j} \|t_i - t_j\|^2$  ((c1) here is due to  $\langle x, y \rangle = \frac{1}{2} [\|x\|^2 + \|y\|^2 - \|x - y\|^2]$ ), (b2) is due to  
 854  $\mathbb{E} \|x_1 + \dots + x_n\|^2 \leq n \mathbb{E} (\|x_1\|^2 + \dots + \|x_n\|^2)$ , and (b3) comes from Lemma E.8.

855 Therefore, we have the bound of  $A_1$ :

$$\begin{aligned} A_1 &\leq \frac{K \eta_L}{2} \|\nabla \tilde{f}(x_t)\|^2 + \frac{\eta_L L^2 K}{2n} \left( 5K \frac{\eta_L^2}{m} \sum_{l=1}^m \frac{1}{p_l^t} (\sigma_L^2 + 4K \zeta_{G,i}^2) \right. \\ &\quad \left. + 20K^2 (A^2 + 1) \eta_L^2 \|\nabla f(x_t)\|^2 \frac{1}{m} \sum_{l=1}^m \frac{1}{p_l^t} \right) - \frac{\eta_L}{2K} \mathbb{E}_t \left\| -\frac{1}{n} \sum_{i \in S_t} \frac{1}{mp_i^t} \sum_{k=0}^{K-1} \nabla F_i(x_{t,k}^i) \right\|^2. \quad (68) \end{aligned}$$

856 The expression for  $A_2$  is as follows:

$$\begin{aligned}
A_2 &= \mathbb{E}_t \|\Delta_t\|^2 \\
&= \mathbb{E}_t \left\| -\eta_L \frac{1}{n} \sum_{i \in S_t} \frac{1}{mp_i^t} \sum_{k=0}^{K-1} g_{t,k}^i \right\|^2 \\
&= \eta_L^2 \mathbb{E}_t \left\| \frac{1}{n} \sum_{i \in S_t} \sum_{k=0}^{K-1} \left( \frac{1}{mp_i^t} g_{t,k}^i - \frac{1}{mp_i^t} \nabla F_i(x_{t,k}^i) \right) \right\|^2 + \eta_L^2 \mathbb{E}_t \left\| -\frac{1}{n} \sum_{i \in S_t} \frac{1}{mp_i^t} \sum_{k=0}^{K-1} \nabla F_i(x_{t,k}^i) \right\|^2 \\
&= \eta_L^2 \frac{1}{n^2} \mathbb{E}_t \left\| \sum_{l=1}^m \mathbb{I}_m \sum_{k=0}^{K-1} \frac{1}{mp_l^t} (g_{t,k}^l - \nabla F_l(x_{t,k}^l)) \right\|^2 + \eta_L^2 \mathbb{E}_t \left\| -\frac{1}{n} \sum_{i \in S_t} \frac{1}{mp_i^t} \sum_{k=0}^{K-1} \nabla F_i(x_{t,k}^i) \right\|^2 \\
&= \eta_L^2 \frac{1}{n^2} \sum_{l=1}^m \mathbb{E}_t \left\| \sum_{k=0}^{K-1} \frac{1}{mp_l^t} (g_{t,k}^l - \nabla F_l(x_{t,k}^l)) \right\|^2 + \eta_L^2 \mathbb{E}_t \left\| -\frac{1}{n} \sum_{i \in S_t} \frac{1}{mp_i^t} \sum_{k=0}^{K-1} \nabla F_i(x_{t,k}^i) \right\|^2 \\
&= \eta_L^2 \frac{1}{n^2} \sum_{l=1}^m np_l^t \mathbb{E}_t \left\| \sum_{k=0}^{K-1} \frac{1}{mp_l^t} (g_{t,k}^l - \nabla F_l(x_{t,k}^l)) \right\|^2 + \eta_L^2 \mathbb{E}_t \left\| -\frac{1}{n} \sum_{i \in S_t} \frac{1}{mp_i^t} \sum_{k=0}^{K-1} \nabla F_i(x_{t,k}^i) \right\|^2 \\
&\leq \eta_L^2 \frac{K}{n} \sum_{l=1}^m \frac{1}{m^2 p_l^t} \sigma_L^2 + \eta_L^2 \mathbb{E}_t \left\| -\frac{1}{n} \sum_{i \in S_t} \frac{1}{mp_i^t} \sum_{k=0}^{K-1} \nabla F_i(x_{t,k}^i) \right\|^2. \tag{69}
\end{aligned}$$

857 Now we substitute the expressions for  $A_1$  and  $A_2$  and take the expectation over the client sampling  
858 distribution on both sides. It should be noted that the derivation of  $A_1$  and  $A_2$  above is based on  
859 considering the expectation over the sampling distribution:

$$\begin{aligned}
f(x_{t+1}) &\leq f(x_t) - \eta \eta_L K \mathbb{E}_t \|\nabla \tilde{f}(x_t)\|^2 + \eta \mathbb{E}_t \left\langle \nabla \tilde{f}(x_t), \Delta_t + \eta_L K \nabla \tilde{f}(x_t) \right\rangle + \frac{L}{2} \eta^2 \mathbb{E}_t \|\Delta_t\|^2 \\
&\stackrel{(b4)}{\leq} f(x_t) - \eta \eta_L K \left( \frac{1}{2} - \frac{20L^2 K^2 (A^2 + 1) \eta_L^2}{nm} \sum_{l=1}^m \frac{1}{p_l^t} \right) \mathbb{E}_t \|\nabla \tilde{f}(x_t)\|^2 + \frac{2K^2 \eta \eta_L^3 L^2}{2nm} \sum_{l=1}^m \frac{1}{p_l^t} (\sigma_L^2 \\
&\quad + 4K \zeta_{G,i}^2) + \frac{L \eta^2 \eta_L^2 K}{2n} \sum_{l=1}^m \frac{1}{p_l^t} \sigma_L^2 - \left( \frac{\eta \eta_L}{2K} - \frac{L \eta^2 \eta_L^2}{2} \right) \mathbb{E}_t \left\| -\frac{1}{n} \sum_{i \in S_t} \frac{1}{mp_i^t} \sum_{k=0}^{K-1} \nabla F_i(x_{t,k}^i) \right\|^2 \\
&\leq f(x_t) - c \eta \eta_L K \mathbb{E}_t \|\nabla \tilde{f}(x_t)\|^2 + \frac{2K^2 \eta \eta_L^3 L^2}{2nm} \sum_{l=1}^m \frac{1}{p_l^t} (\sigma_L^2 + 4K \zeta_{G,i}^2) + \frac{L \eta^2 \eta_L^2 K}{2n} \sum_{l=1}^m \frac{1}{p_l^t} \sigma_L^2. \tag{70}
\end{aligned}$$

860 Also, for (b4), step sizes need to satisfy  $\left( \frac{\eta \eta_L}{2K} - \frac{L \eta^2 \eta_L^2}{2} \right) \geq 0$  if  $\eta \eta_L \leq \frac{1}{KL}$ , and there exists a constant

861  $c > 0$  satisfying  $\left( \frac{1}{2} - \frac{20K^2 \eta_L^2 L^2 (A^2 + 1)}{mn} \sum_{l=1}^m \frac{1}{p_l^t} \right) > c > 0$  if  $\eta_L < \frac{1}{2\sqrt{10(A^2 + 1)KL} \sqrt{\frac{1}{n} \sum_{l=1}^m \frac{1}{mp_l^t}}}$ .

862 Rearranging and summing from  $t = 0, \dots, T-1$ , we have:

$$\sum_{t=1}^{T-1} c \eta \eta_L K \mathbb{E} \|\nabla \tilde{f}(x_t)\|^2 \leq f(x_0) - f(x_T) + T(\eta \eta_L K) \tilde{\Phi}. \tag{71}$$

863 Which implies:

$$\min_{t \in [T]} \mathbb{E} \|\nabla \tilde{f}(x_t)\|^2 \leq \frac{f_0 - f_*}{c \eta \eta_L K T} + \frac{1}{c} \tilde{\Phi}, \tag{72}$$

864 where  $\tilde{\Phi} = \frac{5L^2 K \eta_L^2}{2mn} \sum_{l=1}^m \frac{1}{p_l^t} (\sigma_L^2 + 4K \zeta_{G,i}^2) + \frac{L \eta_L \eta}{2n} \sum_{l=1}^m \frac{1}{m^2 p_l^t} \sigma_L^2$ .

865  $\square$

## F Proof of the Optimal Sampling Probability

### F.1 Sampling probability FedIS

**Corollary F.1** (Optimal sampling probability for FedIS).

$$\min_{p_i^t} \Phi \quad s.t. \sum_{l=1}^m p_l^t = 1.$$

Solving the above optimization problem, we obtain the expression for the optimal sampling probability:

$$p_i^t = \frac{\|\hat{g}_i^t\|}{\sum_{j=1}^m \|\hat{g}_j^t\|}, \quad (73)$$

where  $\hat{g}_i^t = \sum_{k=0}^{K-1} g_k^i$  is the sum of the gradient updates across multiple updates.

Recall Theorem 3.1; only the last variance term in the convergence term  $\Phi$  is affected by sampling. In other words, we need to minimize the variance term with respect to probability. We formalize this as follows:

$$\min_{p_i^t \in [0,1], \sum_{i=1}^m p_i^t = 1} V\left(\frac{1}{mp_i^t} \hat{g}_i^t\right) \Leftrightarrow \min_{p_i^t \in [0,1], \sum_{i=1}^m p_i^t = 1} \frac{1}{m^2} \sum_{i=1}^m \frac{1}{p_i^t} \|\hat{g}_i^t\|^2. \quad (74)$$

This optimization problem can be solved in closed form using the KKT conditions. It is straightforward to verify that the solution to the optimization problem is:

$$p_{i,t}^* = \frac{\|\sum_{k=0}^{K-1} g_{t,k}^i\|}{\sum_{i=1}^m \|\sum_{k=0}^{K-1} g_{t,k}^i\|}, \forall i \in 1, 2, \dots, m. \quad (75)$$

Under the optimal sampling probability, the variance will be:

$$V\left(\frac{1}{mp_i^t} \hat{g}_i^t\right) \leq \mathbb{E} \left\| \frac{\sum_{i=1}^m \hat{g}_i^t}{m} \right\|^2 = \frac{1}{m^2} \mathbb{E} \left\| \sum_{i=1}^m \sum_{k=1}^K \nabla F_i(x_{t,k}, \xi_{k,t}) \right\|^2 \quad (76)$$

Therefore, the variance term is bounded by:

$$V\left(\frac{1}{mp_i^t} \hat{g}_i^t\right) \leq \frac{1}{m} \sum_{i=1}^m K \sum_{k=1}^K \mathbb{E} \|\nabla F_i(x_{t,k}, \xi_{k,t})\|^2 \leq K^2 G^2 \quad (77)$$

**Remark:** If the uniform distribution is adopted with  $p_i^t = \frac{1}{m}$ , it is easy to observe that the variance of the stochastic gradient is bounded by  $\frac{\sum_{i=1}^m \|g_i\|^2}{m}$ .

According to Cauchy-Schwarz inequality,

$$\frac{\sum_{i=1}^m \|\hat{g}_i^t\|^2}{m} \bigg/ \left( \frac{\sum_{i=1}^m \|\hat{g}_i^t\|}{m} \right)^2 = \frac{m \sum_{i=1}^m \|\hat{g}_i^t\|^2}{(\sum_{i=1}^m \|\hat{g}_i^t\|)^2} \geq 1, \quad (78)$$

this implies that importance sampling does improve convergence rate, especially when  $\frac{(\sum_{i=1}^m \|g_i\|)^2}{\sum_{i=1}^m \|g_i\|^2} \ll m$ .

### F.2 Sampling probability of DELTA

Our result is of the following form:

$$\min_{t \in [T]} \mathbb{E} \|\nabla f(x_t)\|^2 \leq \frac{f_0 - f_*}{c\eta_L K T} + \tilde{\Phi}, \quad (79)$$

It is easy to see that the sampling strategy only affects  $\tilde{\Phi}$ . To enhance the convergence rate, we need to minimize  $\tilde{\Phi}$  with respect to  $p_i^t$ . As shown, the expression for  $\tilde{\Phi}$  with and without replacement is

similar, and only differs in the values of  $n$  and  $m$ . Here, we will consider the case with replacement. Specifically, we need to solve the following optimization problem:

$$\min_{p_i^t} \tilde{\Phi} = \frac{1}{c} \left( \frac{5L^2 K \eta_L^2}{2m^2} \sum_{l=1}^m \frac{1}{p_l^t} (\sigma_{L,l}^2 + 4K \zeta_{G,i}^2) + \frac{L \eta_L \eta}{2n} \sum_{l=1}^m \frac{1}{m^2 p_l^t} \sigma_{L,i}^2 \right) \quad s.t. \sum_{l=1}^m p_l^t = 1.$$

Solving this optimization problem, we find that the optimal sampling probability is:

$$p_{i,t}^* = \frac{\sqrt{5KL\eta_L(\sigma_{L,i}^2 + 4K\zeta_{G,i}^2) + \frac{\eta}{n}\sigma_{L,i}^2}}{\sum_{l=1}^m \sqrt{5KL\eta_L(\sigma_{L,l}^2 + 4K\zeta_{G,l}^2) + \frac{\eta}{n}\sigma_{L,l}^2}}. \quad (80)$$

For simplicity, we rewrite the optimal sampling probability as:

$$p_{i,t}^* = \frac{\sqrt{\alpha_1 \zeta_{G,i}^2 + \alpha_2 \sigma_{L,i}^2}}{\sum_{l=1}^m \sqrt{\alpha_1 \zeta_{G,l}^2 + \alpha_2 \sigma_{L,l}^2}}, \quad (81)$$

where  $\alpha_1 = 20K^2 L \eta_L$ ,  $\alpha_2 = 5KL\eta_L + \frac{\eta}{n}$ .

**Remark:** Now, we will compare this result with the uniform sampling strategy:

$$\Phi_{DELTA} = \frac{L\eta_L}{2c} \left( \frac{\sum_{l=1}^m \sqrt{\alpha_1 \zeta_{G,l}^2 + \alpha_2 \sigma_{L,l}^2}}{m} \right)^2. \quad (82)$$

For uniform  $p_l = \frac{1}{m}$ :

$$\Phi_{uniform} = \frac{L\eta_L}{2c} \frac{\sum_{l=1}^m \left( \sqrt{\alpha_1 \zeta_{G,l}^2 + \alpha_2 \sigma_{L,l}^2} \right)^2}{m}. \quad (83)$$

According to Cauchy-Schwarz inequality:

$$\frac{\sum_{l=1}^m \left( \sqrt{\alpha_1 \zeta_{G,l}^2 + \alpha_2 \sigma_{L,l}^2} \right)^2}{m} / \left( \frac{\sum_{l=1}^m \sqrt{\alpha_1 \zeta_{G,l}^2 + \alpha_2 \sigma_{L,l}^2}}{m} \right)^2 = \frac{m \sum_{l=1}^m \left( \sqrt{\alpha_1 \zeta_{G,l}^2 + \alpha_2 \sigma_{L,l}^2} \right)^2}{\left( \sum_{l=1}^m \sqrt{\alpha_1 \zeta_{G,l}^2 + \alpha_2 \sigma_{L,l}^2} \right)^2} \geq 1, \quad (84)$$

this implies that our sampling method does improve the convergence rate (our sampling approach might be  $n$  times faster in convergence than uniform sampling), especially when

$$\frac{\left( \sum_{l=1}^m \sqrt{\alpha_1 \zeta_{G,l}^2 + \alpha_2 \sigma_{L,l}^2} \right)^2}{\sum_{l=1}^m \left( \sqrt{\alpha_1 \zeta_{G,l}^2 + \alpha_2 \sigma_{L,l}^2} \right)^2} \ll m.$$

## G Convergence Analysis of The Practical Algorithm

In order to provide the convergence rate of the practical algorithm, we need an additional Assumption 4 ( $\|\nabla F_i(x)\|^2 \leq G^2, \forall i$ ). This assumption tells us a useful fact that will be used later:

It can be shown that  $\|\nabla F_i(x_{t,k}, \xi_{t,k}) / \nabla F_i(x_{s,k}, \xi_{s,k})\| \leq U$  for all  $i$  and  $k$ , where the subscript  $s$  refers to the last round in which client  $i$  participated, and  $U$  is a constant upper bound. This tells us that the change in the norm of the client's gradient is bounded.  $U$  comes from the following inequality constraint procedure:

$$\begin{aligned} V \left( \frac{1}{mp_i^s} \hat{g}_i^t \right) &= E \left\| \frac{1}{mp_i^s} \hat{g}_i^t - \frac{1}{m} \sum_{i=1}^m \hat{g}_i^t \right\|^2 \leq E \left\| \frac{1}{mp_i^t} \hat{g}_i^t \right\|^2 = E \left\| \frac{1}{m} \frac{\hat{g}_i^t}{\|\hat{g}_i^s\|} \sum_{j=1}^m \|\hat{g}_j^s\| \right\|^2 \\ &\leq E \left( \left\| \frac{1}{m} \right\|^2 \frac{\|\hat{g}_i^t\|^2}{\|\hat{g}_i^s\|^2} \left\| \sum_{j=1}^m \|\hat{g}_j^s\| \right\|^2 \right) \leq \frac{1}{m^2} U^2 m \sum_{j=1}^m K \sum_{k=1}^K E \|\nabla F_j(x_{k,s}, \xi_{k,s})\|^2. \end{aligned} \quad (85)$$

We establish the upper bound  $U$  based on two factors: (1) Assumption 4, and (2) the definition of importance sampling  $E_{q(z)}(F_i(z)) = E_{p(z)}(q_i(z)/p_i(z)F_i(z))$ , where there exists a positive constant  $\gamma$  such that  $p_i(z) \geq \gamma > 0$ . Thus, for  $p_i^s = \frac{\hat{g}_i^s}{\sum_j \hat{g}_j^s} \geq \gamma$ , we can easily ensure  $\frac{\|\hat{g}_i^s\|}{\|\hat{g}_i^s\|} \leq U$  since  $\hat{g}_i^s > 0$  is consistently bounded.

In general, the gradient norm tends to become smaller as training progresses, which leads to  $\|\nabla F_i(x_{t,k}, \xi_{t,k})/\nabla F_i(x_{s,k}, \xi_{s,k})\|$  going to zero. Even if there are some oscillations in the gradient norm, the gradient will vary within a limited range and will not diverge to infinity.

Based on Assumption 4 and Assumption 3, we can re-derive the convergence analysis for both convergence variance  $\Phi$  (4) and  $\tilde{\Phi}$  (46). In particular, for Assumption 3 ( $\mathbb{E}\|\nabla F_i(x)\|^2 \leq (A^2 + 1)\|\nabla f(x)\|^2 + \sigma_G^2$ ), we use  $\sigma_{G,s}$  and  $\sigma_{G,t}$  instead of a unified  $\sigma_G$  for the sake of comparison.

Specifically,  $\Phi = \frac{1}{c}[\frac{5\eta_L^2 L^2 K}{2m} \sum_{i=1}^m (\sigma_L^2 + 4K\sigma_G^2) + \frac{\eta\eta_L L}{2m} \sigma_L^2 + \frac{L\eta\eta_L}{2nK} V(\frac{1}{mp_i^t} \hat{g}_i^t)]$ , where  $\hat{g}_i^t = \sum_{k=1}^K \nabla F_i(x_{k,s}, \xi_{k,s})$ . With the practical sampling probability  $p_i^s$  of FedIS:

$$V\left(\frac{1}{mp_i^s} \hat{g}_i^t\right) = E\left\|\frac{1}{mp_i^s} \hat{g}_i^t - \frac{1}{m} \sum_{i=1}^m \hat{g}_i^t\right\|^2 \leq E\left\|\frac{1}{mp_i^t} \hat{g}_i^t\right\|^2 = E\left\|\frac{1}{m} \frac{\hat{g}_i^t}{\hat{g}_i^t} \sum_{j=1}^m \hat{g}_j^s\right\|^2. \quad (86)$$

According to Assumption 4, we know  $\|\frac{\hat{g}_i^t}{\hat{g}_i^s}\|^2 = \|\frac{\sum_{k=1}^K \nabla F_i(x_{t,k}, \xi_{t,k})}{\sum_{k=1}^K \nabla F_i(x_{s,k}, \xi_{s,k})}\|^2 \leq U^2$ . Then we get

$$\begin{aligned} V\left(\frac{1}{mp_i^s} \hat{g}_i^t\right) &\leq E\left(\left\|\frac{1}{m}\right\|^2 \left\|\frac{\hat{g}_i^t}{\hat{g}_i^s}\right\|^2 \left\|\sum_{j=1}^m \hat{g}_j^s\right\|^2\right) \leq \frac{1}{m^2} U^2 E\left\|\sum_{i=1}^m \sum_{k=1}^K \nabla F_i(x_{k,s}, \xi_{k,s})\right\|^2 \\ &\leq \frac{1}{m^2} U^2 m \sum_{i=1}^m K \sum_{k=1}^K E\|\nabla F_i(x_{k,s}, \xi_{k,s})\|^2 \end{aligned} \quad (87)$$

Similar to the previous proof, based on Assumption 3, we can get the new convergence rate:

$$\min_{t \in [T]} E\|\nabla f(x_t)\|^2 \leq \mathcal{O}\left(\frac{f^0 - f^*}{\sqrt{nKT}}\right) + \underbrace{\mathcal{O}\left(\frac{\sigma_L^2}{\sqrt{nKT}}\right) + \mathcal{O}\left(\frac{M^2}{T}\right) + \mathcal{O}\left(\frac{KU^2\sigma_{G,s}^2}{\sqrt{nKT}}\right)}_{\text{order of } \Phi}. \quad (88)$$

where  $M = \sigma_L^2 + 4K\sigma_{G,s}^2$ .

**Remark G.1** (Discussion on  $U$  and convergence rate.). It is worth noting that  $\|\nabla F_i(x_{t,k}, \xi_{t,k})/\nabla F_i(x_{s,k}, \xi_{s,k})\|$  is typically relatively small because the gradient tends to go to zero as the training process progresses. This means that  $U$  can be relatively small, more specifically,  $U < 1$  in the upper bound term  $\mathcal{O}\left(\frac{KU^2\sigma_{G,s}^2}{\sqrt{nKT}}\right)$ . However, this does not necessarily mean that the practical algorithm is better than the theoretical algorithm because the values of  $\sigma_G$  are different, as we stated at the beginning. Typically, the value of  $\sigma_{G,s}$  for the practical algorithm is larger than the value of  $\sigma_{G,t}$ , which also comes from the fact that the gradient tends to go to zero as the training process progresses. Additionally, due to the presence of the summation over both  $i$  and  $k$ , the gap between  $\sigma_{G,s}$  and  $\sigma_{G,t}$  is multiplied, and  $\sigma_{G,s}/\sigma_{G,t} \sim m^2 K^2 \frac{1}{U^2}$ . Thus, the practical algorithm leads to a slower convergence than the theoretical algorithm.

Similarly, as long as the gradient is consistently bounded, we can assume that  $\|\nabla F_i(x_t) - \nabla f(x_t)\|/\|\nabla F_i(x_s) - \nabla f(x_s)\| \leq \tilde{U}_1 \leq \tilde{U}$  and  $\|\sigma_{L,t}/\sigma_{L,s}\| \leq \tilde{U}_2 \leq \tilde{U}$  for all  $i$ , where  $\sigma_{L,s}^2 = \mathbb{E}[\|\nabla F_i(x_s, \xi_s^i) - \nabla F_i(x_s)\|^2]$ . Then, we can obtain a similar conclusion by following the same analysis on  $\tilde{\Phi}$ .

Specifically, we have  $\tilde{\Phi} = \frac{L\eta_L}{2m^2c} \sum_{i=1}^m \frac{1}{p_i^s} (\alpha_1 \zeta_{G,i}^2 + \alpha_2 \sigma_{L,i}^2)$ , where  $\alpha_1$  and  $\alpha_2$  are constants defined in (13). For the sake of comparison of different participation rounds  $s$  and  $t$ , we rewrite the symbols as  $\zeta_{G,s}^i$  and  $\sigma_{L,s}^i$ . Then, using the practical sampling probability  $p_i^s$  of DELTA, and letting  $R_i^s =$



937  $\sqrt{\alpha_1 \zeta_{G,s}^2 + \alpha_2 \sigma_{L,s}^2}$ , we have:

$$\begin{aligned}
\tilde{\Phi} &= \frac{L\eta_L}{2m^2c} \sum_{i=1}^m \frac{1}{p_i^s} (R_i^t)^2 = \frac{L\eta_L}{2m^2c} \sum_{i=1}^m \frac{(R_i^t)^2}{R_i^s} \sum_{j=1}^m (R_j^s)^2 = \frac{L\eta_L}{2m^2c} \sum_{i=1}^m \left( \frac{R_i^t}{R_i^s} \right)^2 R_i^s \sum_{j=1}^m R_j^s \\
&\leq \frac{L\eta_L}{2m^2c} \tilde{U}^2 \sum_{i=1}^m R_i^s \sum_{j=1}^m R_j^s = \frac{L\eta_L}{2m^2c} \tilde{U}^2 \left( \sum_{i=1}^m R_i^s \right)^2 \leq \frac{L\eta_L}{2m^2c} \tilde{U}^2 m \sum_{i=1}^m (R_i^s)^2 \\
&\leq \frac{L\eta_L}{2c} \tilde{U}^2 (5KL\eta_L(\sigma_{L,s}^2 + 4K\zeta_{G,s}^2) + \frac{\eta}{n}\sigma_L^2)
\end{aligned} \tag{89}$$

938 Therefore, compared to the theoretical algorithm of DELTA, the practical algorithm of DELTA has  
939 the following convergence rate:

$$\min_{t \in [T]} \mathbb{E} \|\nabla f(x_t)\|^2 \leq \mathcal{O} \left( \frac{f^0 - f^*}{\sqrt{nKT}} \right) + \underbrace{\mathcal{O} \left( \frac{\tilde{U}^2 \sigma_{L,s}^2}{\sqrt{nKT}} \right) + \mathcal{O} \left( \frac{\tilde{U}^2 \sigma_{L,s}^2 + 4K\tilde{U}^2 \zeta_{G,s}^2}{KT} \right)}_{\text{order of } \tilde{\Phi}}. \tag{90}$$

940 This discussion of the effect of  $\tilde{U}$  on the convergence rate is similar to the discussion of  $U$  in  
941 Remark G.1.

## 942 H Additional Experiment Results and Experiment Details.

### 943 H.1 Experimental Environment

944 For all experiments, we use NVIDIA GeForce RTX 3090 GPUs. Each simulation trail with 500  
945 communication rounds and three random seeds.

### 946 H.2 Experiment setup

947 **Setup for the synthetic dataset.** To demonstrate the validity of our theoretical results, we first  
948 conduct experiments using logistic regression on synthetic datasets. Specifically, we randomly  
949 generate  $(x, y)$  pairs using the equation  $y = \log \left( \frac{(Ax-b)^2}{2} \right)$  with given values for  $A_i$  and  $b_i$  as  
950 training data for clients. Each client's local dataset contains 1000 samples. In each round, we select  
951 10 out of 20 clients to participate in training (we also provide the results of 10 out of 200 clients in  
952 Figure 11).

953 To simulate gradient noise, we calculate the gradient for each client  $i$  using the equation  $g_i =$   
954  $\nabla f_i(A_i, b_i, D_i) + \nu_i$ , where  $A_i$  and  $b_i$  are the model parameters,  $D_i$  is the local dataset for client  $i$ ,  
955 and  $\nu_i$  is a zero-mean random variable that controls the heterogeneity of client  $i$ . The larger the value  
956 of  $\mathbb{E} \|\nu_i\|^2$ , the greater the heterogeneity of client  $i$ .

957 We demonstrate the experiment on different functions with different values of  $A$  and  $b$ . Each function  
958 is set with noise levels of 20, 30, and 40 to illustrate our theoretical results. To construct different  
959 functions, we set  $A = 8, 10$  and  $b = 2, 1$ , respectively, to observe the convergence behavior of  
960 different functions.

961 All the algorithms run in the same environment with a fixed learning rate of 0.001. We train each  
962 experiment for 2000 rounds to ensure that the global loss has a stable convergence performance.

963 **Setup for FashionMNIST and CIFAR-10.** To evaluate the performance of DELTA and FedIS,  
964 we train a two-layer CNN on the non-iid FashionMNIST dataset and a ResNet-18 on the non-iid  
965 CIFAR-10 dataset, respectively. CIFAR-10 is composed of  $32 \times 32$  images with three RGB channels,  
966 belonging to 10 different classes with 60000 samples.

967 The "non-iid" follows the idea introduced in [66, 16], where we leverage Latent Dirichlet Allocation  
968 (LDA) to control the distribution drift with the Dirichlet parameter  $\alpha$ . Larger  $\alpha$  indicates smaller  
969 drifts. Unless otherwise stated, we set the Dirichlet parameter  $\alpha = 0.5$ .

Unless specifically mentioned otherwise, our studies use the following protocol: all datasets are split with a parameter of  $\alpha = 0.5$ , the server chooses  $n = 20$  clients according to our proposed probability from the total of  $m = 300$  clients, and each is trained for  $T = 500$  communication rounds with  $K = 5$  local epochs. The default local dataset batch size is 32. The learning rates are set the same for all algorithms, specifically  $lr_{global} = 1$  and  $lr_{local} = 0.01$ .

All algorithms use FedAvg as the backbone. We compare DELTA, FedIS and Cluster-based IS with FedAvg on different datasets with different settings.

**Setup for Split-FashionMNIST.** In this section, we evaluate our algorithms on the split-FashionMNIST dataset. In particular, we let 10% clients own 90% of the data, and the detailed split data process is shown below:

- Divide the dataset by labels. For example, divide FashionMNIST into 10 groups, and assign each client one label
- Random select one client
- Reshuffle the data in the selected client
- Equally divided into 100 clients

**Setup for LEAF.** To test our algorithm’s efficiency on diverse real datasets, we use the non-IID FEMNIST dataset and non-IID CelebA dataset in LEAF, as given in [3]. All baselines use a 4-layer CNN for both datasets with a learning rate of  $lr_{local} = 0.1$ , batch size of 32, sample ratio of 20% and communication round of  $T = 500$ . The reported results are averaged over three runs with different random seeds.

**The implementation detail of different sampling algorithms.** The power-of-choice sampling method is proposed by [7]. The sampling strategy is to first sample 20 clients randomly from all clients, and then choose 10 of the 20 clients with the largest loss as the selected clients. FedAvg samples clients according to their data ratio. Thus, FedAvg promises to be unbiased, which is given in [12, 31] to be an unbiased sampling method. As for FedIS, the sampling strategy follows Equation (5). For cluster-based IS, it first clusters clients following the gradient norm and then uses the importance sampling strategy similar to FedIS in each cluster. And for DELTA, the sampling probability follows Equation (13). For the practical implementation of FedIS and DELTA, the sampling probability follows the strategy described in Section 4.

### H.3 Additional Experimental Results

**Performance of algorithms on the synthetic dataset.** We display the log of the global loss of different sampling methods on synthetic dataset in Figure 9, where the Power-of-Choice is a biased sampling strategy that selects clients with higher loss [7].

We also show the convergence behavior of different sampling algorithms under small noise, as shown in Figure 10.

To simulate a large number of clients, we increased the client number from 20 to 200, with only 10 clients participating in each round. The results in Figure 11 demonstrate the effectiveness of DELTA.

**Convergence performance of theoretical DELTA on split-FashionMNIST and practical DELTA on FEMNIST.** Figure 12(a) illustrates the theoretical DELTA outperforms other methods in convergence speed. Figure 12(b) indicates that cluster-based IS and practical DELTA exhibit rapid initial accuracy improvement, while practical DELTA and practical IS achieve higher accuracy in the end.

**Ablation study for DELTA with different sampled numbers.** Figure 13 shows the accuracy performance of practical DELTA algorithms on FEMNIST with different sampled numbers of clients. In particular, the larger number of sampled clients, the faster the convergence speed is. This is consistent with our theoretical result (Corollary 4.2).

**Performance on FashionMNIST and CIFAR-10.** For CIFAR-10, we report the mean of the best 10 test accuracies on test data. In Table 2, we compare the performance of DELTA, FedIS,

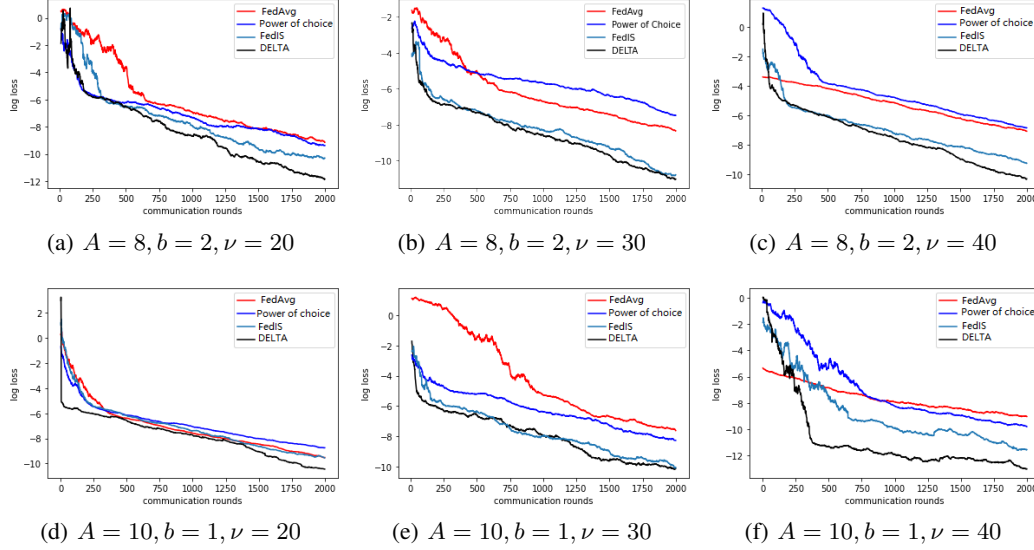

Figure 9: Performance of different algorithms on the regression model. The loss is calculated by  $f(x, y) = \left\| y - \log\left(\frac{A_i x - b_i}{2}\right) \right\|^2$ , we report the logarithm of the global loss with different degrees of gradient noise  $\nu$ . All methods are well-tuned, and we report the best result of each algorithm under each setting.

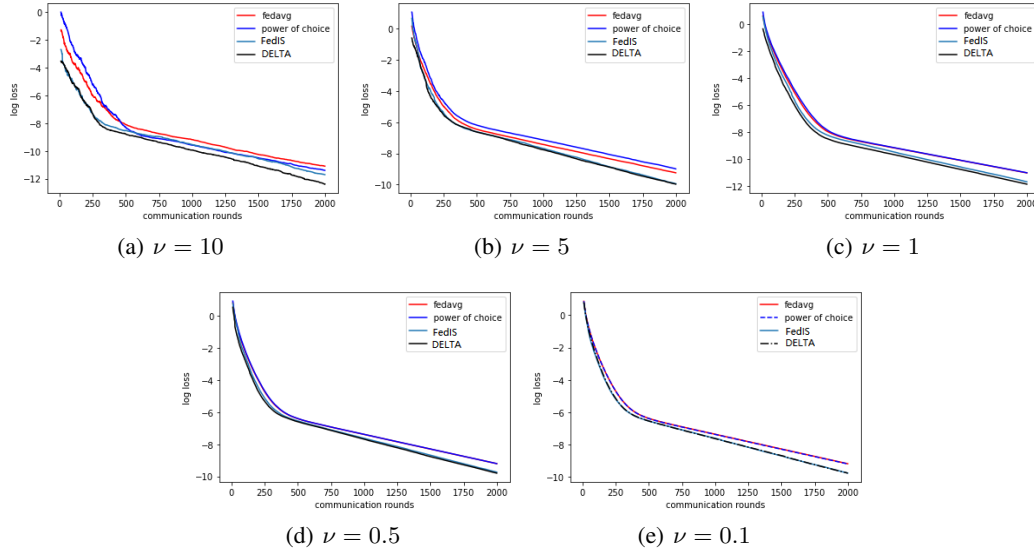

Figure 10: Performance of different algorithms on the regression model with different (small) noise settings.

1017 and FedAvg on non-IID FashionMNIST and CIFAR-10 datasets. Specifically, we use  $\alpha = 0.1$  for  
 1018 FashionMNIST and  $\alpha = 0.5$  for CIFAR-10 to split the datasets. As for Multinomial Distribution  
 1019 (MD) sampling [29], it samples based on the clients' data ratio and average aggregates. It is symmetric  
 1020 in sampling and aggregation with FedAvg, with similar performance. It can be seen that DELTA has  
 1021 better accuracy than FedIS, while both DELTA and FedIS outperform FedAvg with the same number  
 1022 of communication rounds.

1023 **Assessing the Compatibility of FedIS with Other Optimization Methods.** In Table 4, we  
 1024 demonstrate that DELTA and FedIS are compatible with other FL optimization algorithms, such as  
 1025 Fedprox [29] and FedMIME [20]. Furthermore, DELTA maintains its superiority in this setting.

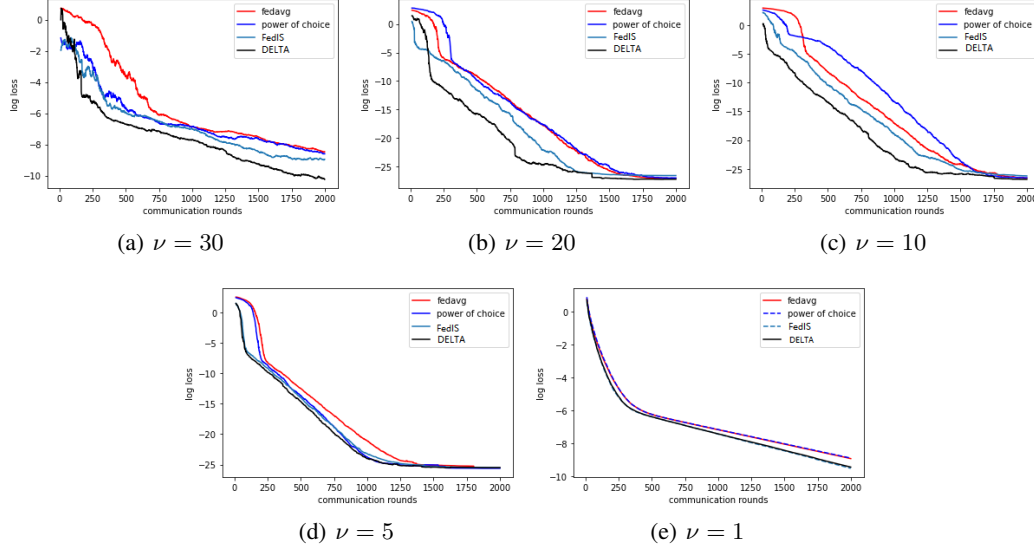

Figure 11: Performance of different algorithms on synthetic data with different noise settings. Specifically, for testing the large client number setting, in each round, 10 out of 200 clients are selected to participate in training.

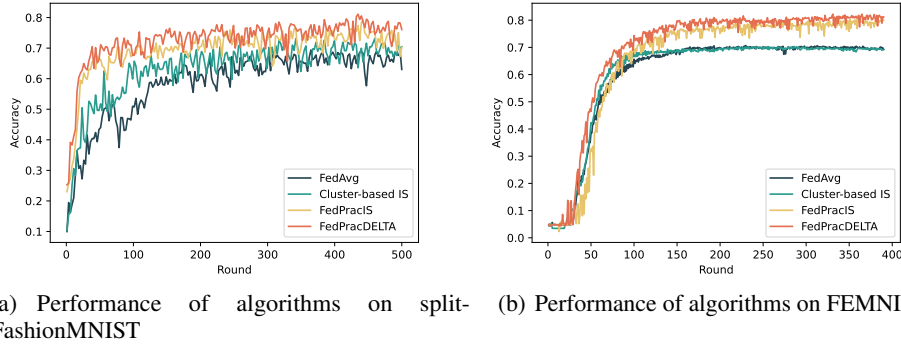

Figure 12: Performance comparison of accuracy using different sampling algorithms.

Table 4: **Performance of sampling algorithms integrated with momentum and prox.** We run 500 communication rounds on CIFAR-10 for each algorithm. We report the mean of maximum 5 accuracies for test datasets and the number of communication rounds to reach the threshold accuracy.

| Algorithm                    | Sampling + momentum |                | Sampling + proximal |                |
|------------------------------|---------------------|----------------|---------------------|----------------|
|                              | Acc (%)             | Rounds for 65% | Acc (%)             | rounds for 65% |
| FedAvg (w/ uniform sampling) | 0.6567              | 390            | 0.6596              | 283            |
| FedIS                        | 0.6571              | <b>252</b>     | 0.661               | 266            |
| DELTA                        | <b>0.6604</b>       | 283            | <b>0.6677</b>       | <b>252</b>     |

1026 In Table 5, we demonstrate that DELTA and FedIS are compatible with other variance reduction  
1027 algorithms, like FedVARP [18].

1028 It is worth noting that FedVARP utilizes the historic update to approximate the unparticipated clients'  
1029 updates. However, in this setting, the improvement of the sampling strategy on the results is somewhat  
1030 reduced. This is because the sampling strategy is slightly redundant when all users are involved.  
1031 Thus, when VARP and DELTA/FedIS are combined, instead of reassigning weights in the aggregation  
1032 step, we use (75) or (13) to select the current round update clients and then average aggregate the  
1033 updates of all clients. One can see that the combination of DELTA/FedIS and VARP can still show  
1034 the advantages of sampling.

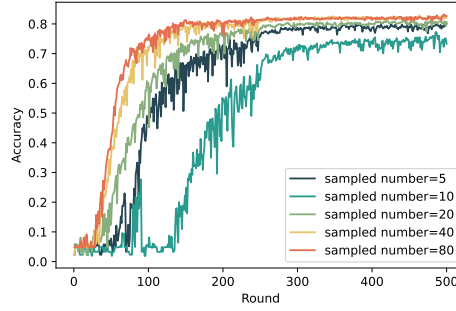

Figure 13: Ablation study of the number of sampled clients.

Table 5: **Performance of DELTA/FedIS in combination with FedVARP.** We run 500 communication rounds on FashionMNIST with  $\alpha = 0.1$  for each algorithm. We report the mean of maximum 5 accuracies for test datasets and the number of communication rounds to reach the threshold accuracy.

| Algorithm       | FashionMNIST                       |                |
|-----------------|------------------------------------|----------------|
|                 | Acc (%)                            | Rounds for 73% |
| FedVARP         | $73.81 \pm 0.18$                   | 470            |
| FedIS + FedVARP | $73.96 \pm 0.14$                   | 452            |
| DELTA + FedVARP | <b><math>74.22 \pm 0.14</math></b> | <b>436</b>     |

1035 **Ablation study for  $\alpha$ .** In Table 6, we experiment with different choices of heterogeneity  $\alpha$  in the  
 1036 CIFAR-10 dataset. The parameter of heterogeneity  $\alpha$  changes from 0.1 to 0.5 to 1. We observe a  
 1037 consistent improvement of DELTA compared to the other algorithms. This shows that DELTA is  
 1038 robust to changes in the level of heterogeneity in the data distribution.

Table 6: **Performance of algorithms under different  $\alpha$ .** We run 500 communication rounds on CIFAR10 for each algorithm (with momentum). We report the mean of maximum 5 accuracies for test datasets and the number of communication rounds to reach the threshold accuracy.

| Algorithm                    | $\alpha = 0.1$ |                | $\alpha = 0.5$ |                | $\alpha = 1.0$ |                |
|------------------------------|----------------|----------------|----------------|----------------|----------------|----------------|
|                              | Acc (%)        | Rounds for 42% | Acc (%)        | rounds for 65% | Acc (%)        | rounds for 71% |
| FedAvg (w/ uniform sampling) | 0.4209         | 263            | 0.6567         | 283            | 0.7183         | 246            |
| FedIS                        | 0.427          | 305            | 0.6571         | <b>252</b>     | 0.7218         | 239            |
| DELTA                        | <b>0.4311</b>  | <b>209</b>     | <b>0.6604</b>  | 283            | <b>0.7248</b>  | <b>221</b>     |
